# Supplementary material for: Stressed erythrophagocytosis induces immunosuppression during sepsis through heme-mediated STAT1 dysregulation
Source: JCI journal article supplement (doi:10.1172/jci137468), 2020-09-17
Supplement: sd1 [file 1]

**Olonisakin, T et. al**  
**Supplemental figures**

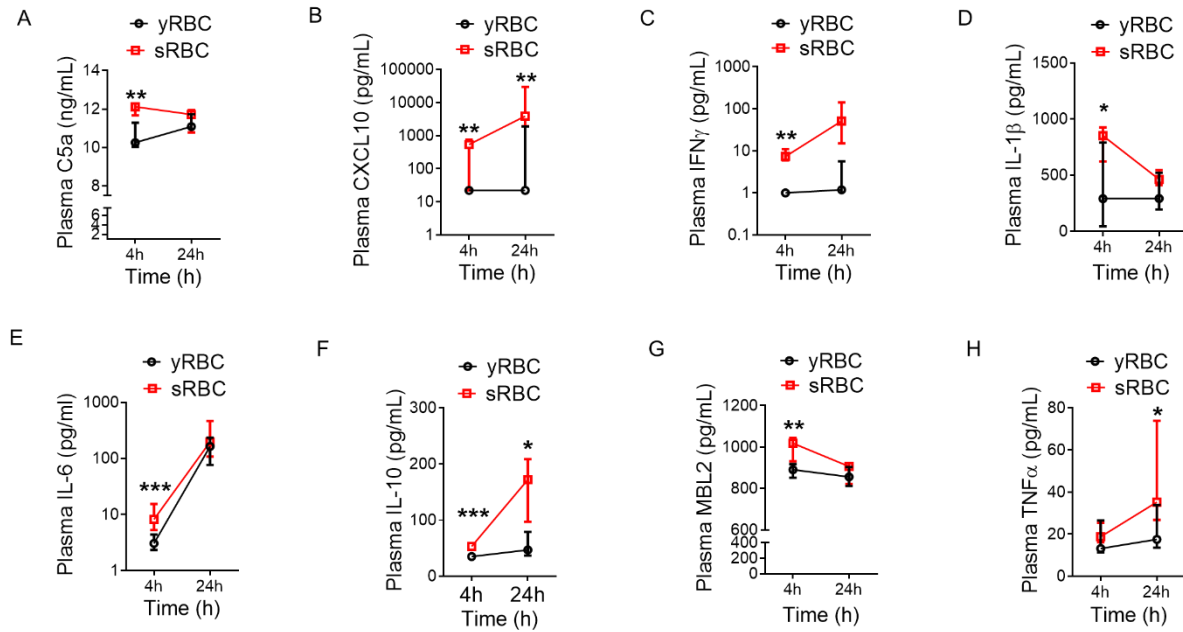

**Figure S1: Increased systemic inflammatory response with sRBC delivery during *K. pneumoniae* extrapulmonary dissemination.** *K. pneumoniae* was instilled intratracheally into C57BL/6 mice followed by challenge with either young (yRBC) or senescent RBC (sRBC). Mice were euthanized at pre-determined specified time points as indicated. Mouse plasma cytokines were measured by ELISA. (A) C5a, (B) CXCL10, (C) IFN $\gamma$ , (D) IL-1 $\beta$ , (E) IL-6, (F) IL-10, (G) MBL2, and (H) TNF- $\alpha$ . Each point indicates median with error bars, n=4-8 mice/group. \*p<0.05, \*\*p<0.01, \*\*\*p<0.001 by Mann-Whitney U two-tailed test.

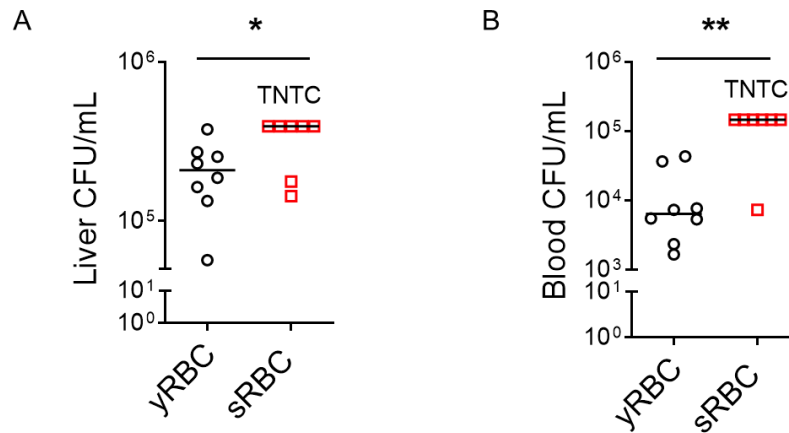

**Figure S2: RBC washing prior to transfusion does not mitigate extrapulmonary bacterial proliferation.** KP was instilled intratracheally into C57BL/6 mice and was followed by challenge with washed yRBC or sRBC. Bacterial burden was obtained from (A) liver tissue homogenates and (B) blood of mice 24 h post-KP instillation. n=7–8 mice per group. TNTC = Bacteria too numerous to count. \*p<0.05, \*\*p<0.01 by Mann-Whitney U two-tailed test.

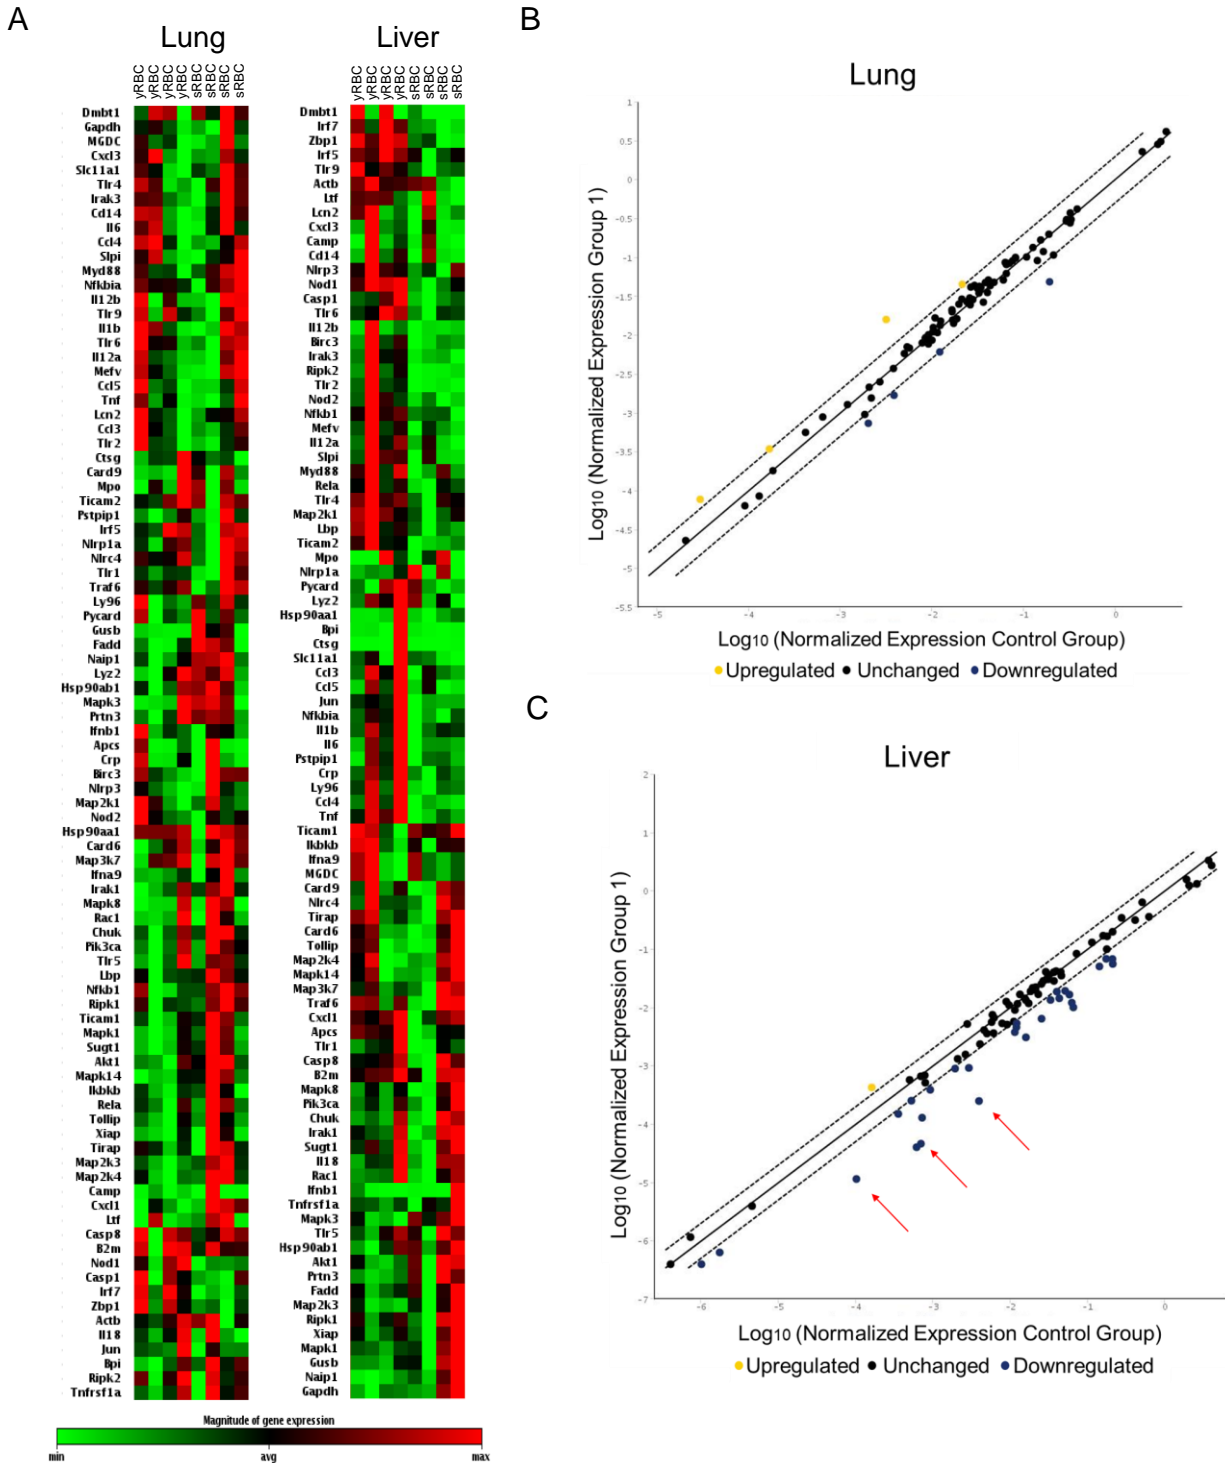

**Figure S3: Differentially regulated genes in the lungs and livers of KP-infected mice challenged with yRBC or sRBC at 24 h. (A)** Heat map depicting 87 genes examined by PCR-Array for alterations in mouse antibacterial response in lungs and livers of mice challenged with yRBC or sRBC 24 hours post-KP infection. Scatter plot of lung (B) and (C) liver depicting

**Olonisakin, T et. al**  
**Supplemental figures**

differentially expressed genes with >2-fold change. Red = upregulated. Green = downregulated. n = 4 mice per group. Red arrows highlight marked downregulation of antibacterial gene expression in the liver following sRBC delivery.

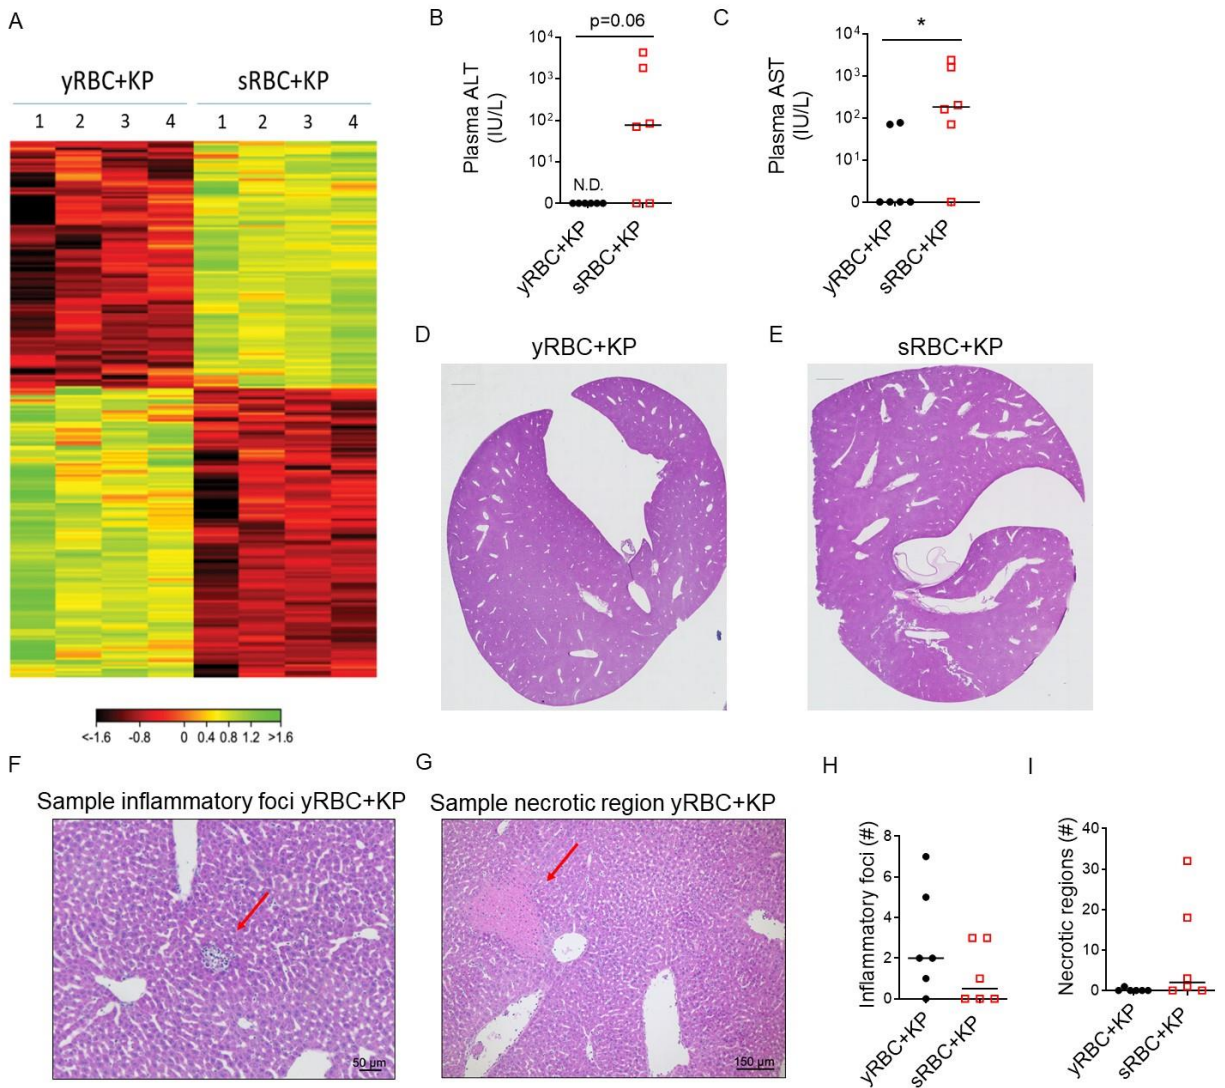

**Figure S4: Mouse liver RNA-Seq, plasma transaminase concentrations, and liver histology following yRBC or sRBC delivery in the acute KP infection model.** (A) Heat map depicting differentially expressed genes in the livers of mice challenged with either yRBC or sRBC 24 h post-KP infection. Threshold 1.5-fold change, FDR adjusted p-value  $\leq 0.05$ .  $n=4$  mice per group. Green = upregulated. Dark Red = downregulated. Alanine transaminase (ALT) (B) and Aspartate transaminase (AST) (C) were obtained in plasma of mice challenged with yRBC or sRBC 24 h post-KP infection. Line indicates median,  $n = 6$  mice per group.  $*p<0.05$  by Mann-Whitney U test. (D-E) Representative liver tissue section of mice challenged with yRBC or sRBC 24 h post-KP infection,  $n = 6$  mice per group. Scale bar = 1 mm. (F) Sample inflammatory foci and (G) Sample necrotic regions in liver histology following yRBC delivery 24 h post-KP infection. (H, I) Number of inflammatory foci or necrotic regions per liver section with each data point depicting individual mouse.  $n = 6$  mice per group.

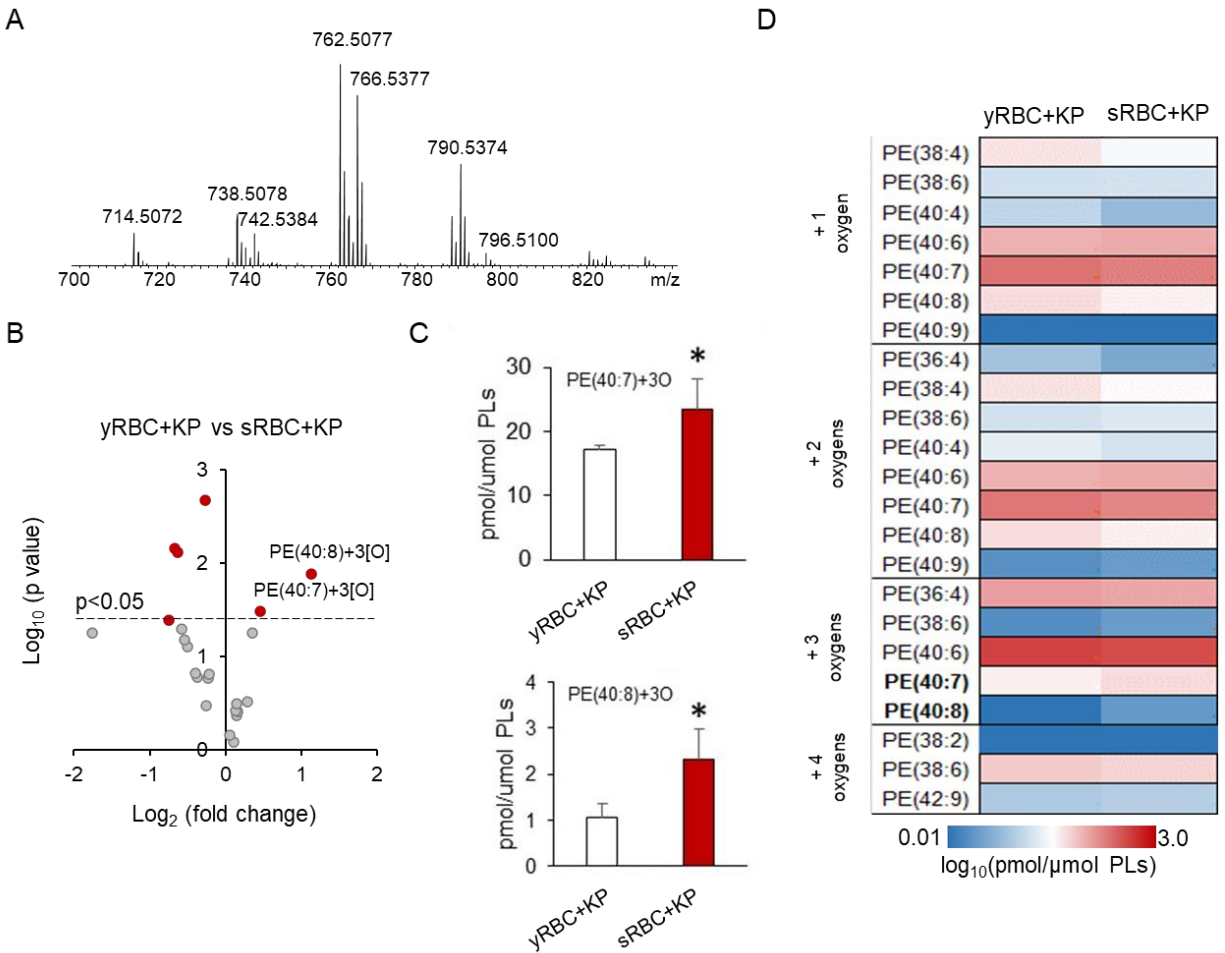

**Figure S5: Assessment of oxygenated phosphatidylethanolamine (PE) species in mouse liver following sRBC delivery.** (A) Typical mass spectrum of PE species from mouse liver. (B) Differences in the level of oxygenated PE (PEox) species in livers from KP-infected mice challenged with yRBC or sRBC. (C) Quantitative LC/MS assessment of PEOx. n= 4 mice per group. (D) Heat map of PEOx species.

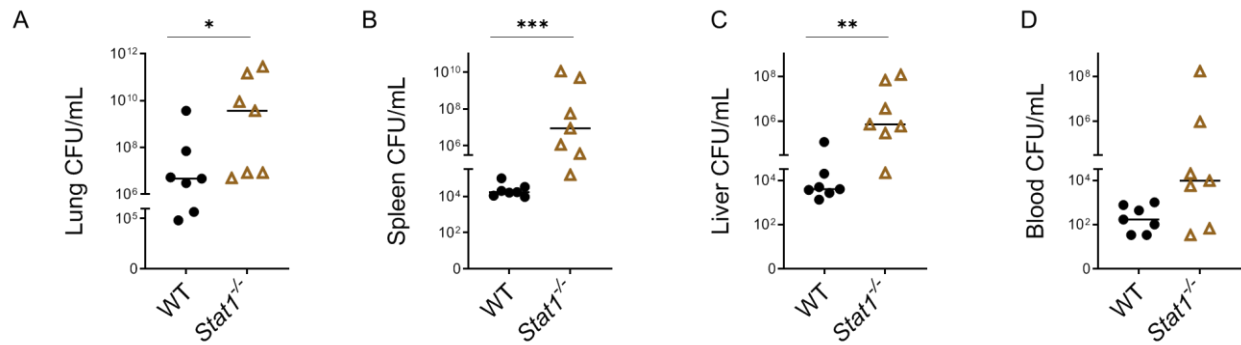

**Figure S6: Mice deficient in STAT1 show increased extrapulmonary bacterial proliferation following *K. pneumoniae* intrapulmonary infection.** (A) Lung, (B) Spleen, (C) Liver, and (D) Blood bacterial burden 48 h following intratracheal KP instillation in WT and *Stat1*<sup>-/-</sup> mice and reported as CFU/mL. (A-D) Each point indicates individual mice, n=7 mice per group. Line indicates median. \*p<0.05, \*\*p<0.01, \*\*\*p<0.001 by Mann-Whitney U two-tailed test.

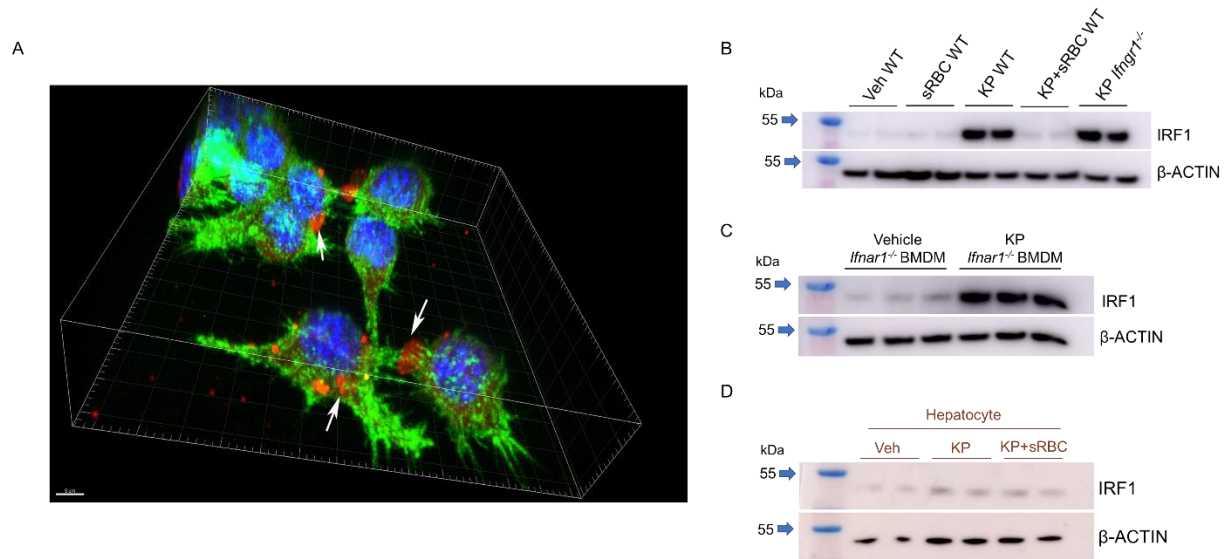

**Figure S7: sRBC delivery impairs interferon expression in *K. pneumoniae*-infected macrophages independently of type I or II interferon receptor-mediated signaling.** (A) Three-dimensional visualization of sRBC uptake in RAW 264.7 cells. Arrow indicates internalized CD235a-labeled sRBC (red), nuclei are stained with Hoechst (blue), and macrophages are labeled with F4/80 (green). Scale bar = 5  $\mu$ m. (B-C) IRF1 immunoblots in bone marrow-derived macrophages (BMDM) obtained from *Ifngr1*<sup>-/-</sup>, *Ifnar1*<sup>-/-</sup>, and wild-type (WT) mice challenged with vehicle (PBS), sRBC, KP or KP + sRBC for 4 h. Blots are indicative of two independent experiments. (D) IRF1 immunoblots in primary hepatocytes obtained following collagenase perfusion of murine liver and challenged with vehicle, KP or KP + sRBC for 4 h. Blot is indicative of two independent experiments.



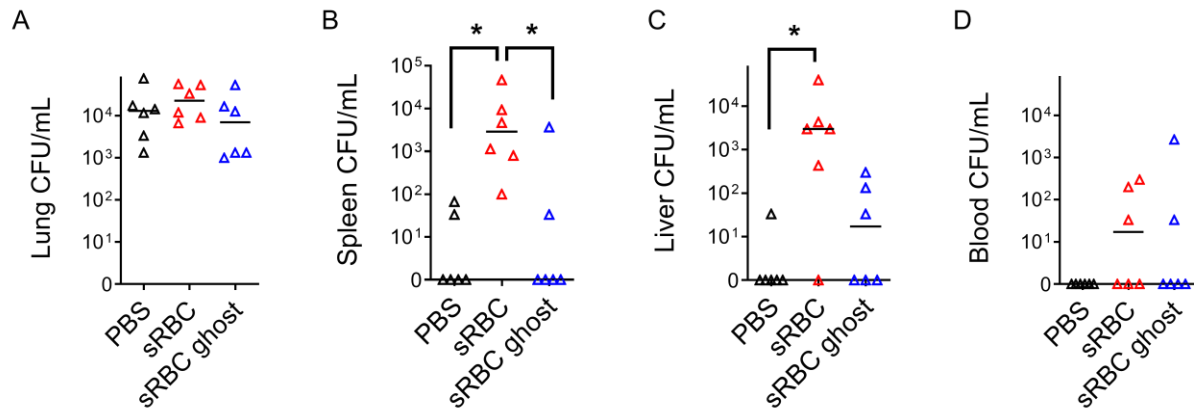

**Figure S8: Depletion of hemoglobin from RBC limits *K. pneumoniae* extrapulmonary proliferation.** *EntB ybtS* KP mutant was instilled intratracheally into C57BL/6 mice (10<sup>3</sup> CFU inoculum) and followed by challenge with PBS vehicle, sRBC or sRBC ghost. Mice were euthanized and tissue harvested 24 h post-infection. Bacterial burden was estimated in (A) lung, (B) spleen, (C) liver homogenates, and blood as CFU per milliliter. Each data point indicates individual mice, n = 6 mice per group. Lines indicate median. \*p <0.05 by Kruskal-Wallis test with Dunn's multiple comparisons.

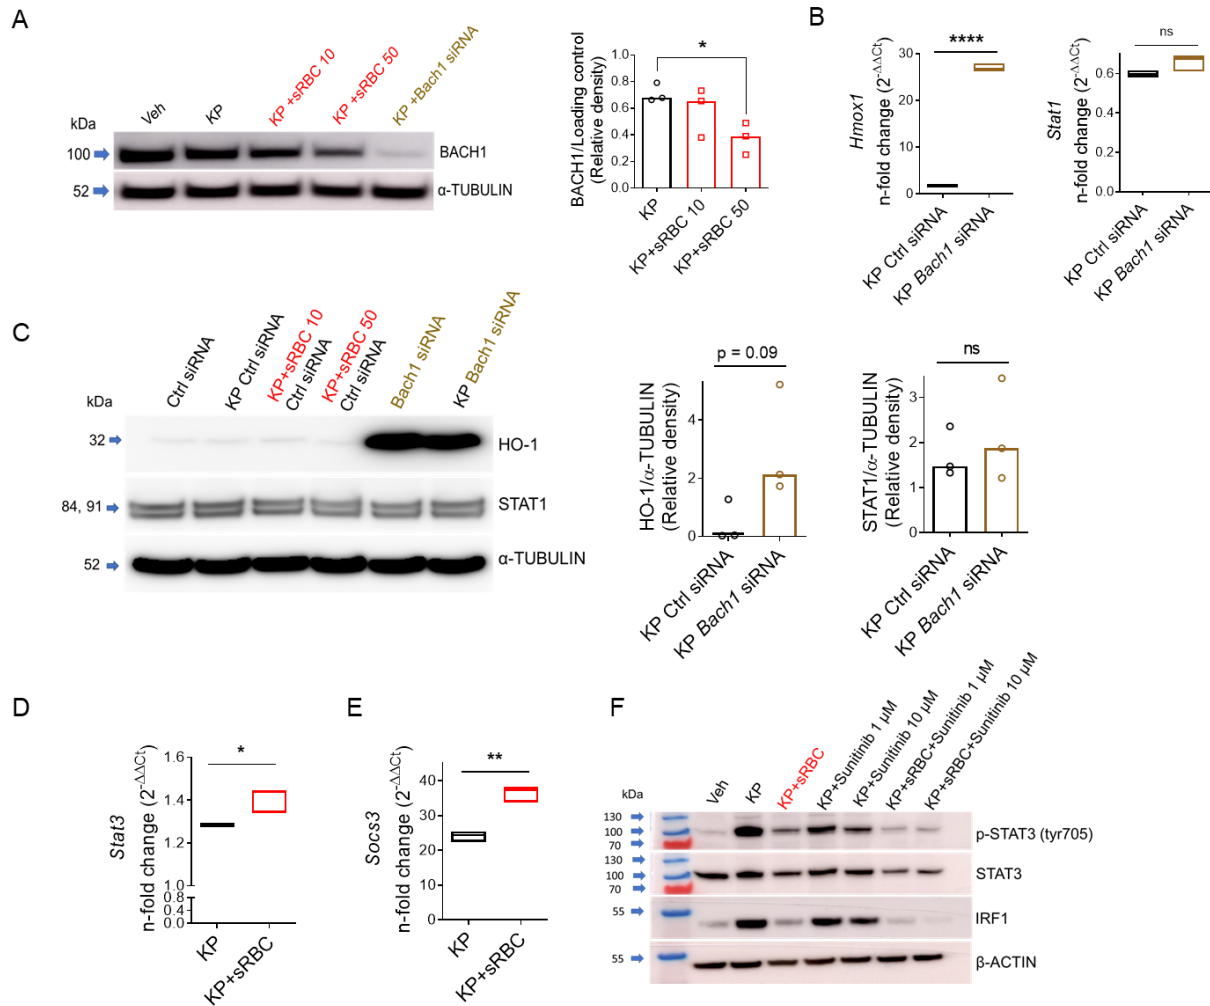

**Figure S9: sRBC-mediated STAT1 suppression during *K. pneumoniae* infection is neither dependent on BACH1 degradation nor STAT3 activation.** (A) BACH1 immunoblot in RAW cells challenged with vehicle (PBS), KP or KP + sRBC (50:1) for 4 h. Blot is indicative of three independent experiments. *Left*, immunoblot. *Right*, relative density of three independent experiments. \*p < 0.05 by one-way ANOVA with Tukey's multiple comparisons test. (B) *Hmox1* and *Stat1* expression in RAW cells transfected with scrambled siRNA (control siRNA) or *Bach1* siRNA and subsequently challenged with KP for 4 h. n = 3 technical replicates per group, \*\*\*\*p < 0.0001 by two-tailed t test. (C) HO-1, STAT1 immunoblot in RAW cells transfected with control siRNA or *Bach1* siRNA and challenged with KP or KP + sRBC for 4 h. Blot is indicative of three independent experiments. *Left*, immunoblot. *Right*, relative density of three independent experiments. p = 0.09 by two-tailed t test (D) *Stat3* and (E) *Soc33* gene expression in RAW cells challenged with *K. pneumoniae* (KP) or KP + sRBC for 2 h. Gene expression was evaluated by qPCR analysis. (D-E) Fold change relative to vehicle (PBS)-treated macrophages. Floating bar plots indicate median and 25-75%, n = 3 technical replicates per group. \*p < 0.05, \*\*p < 0.01 by two-tailed t test. (F) p-STAT3, STAT3 and IRF1 in RAW macrophages challenged with vehicle (PBS), KP, KP + sRBC or KP + indicated concentrations of sunitinib for 4 h.

Olonisakin, T et. al  
Supplemental figures

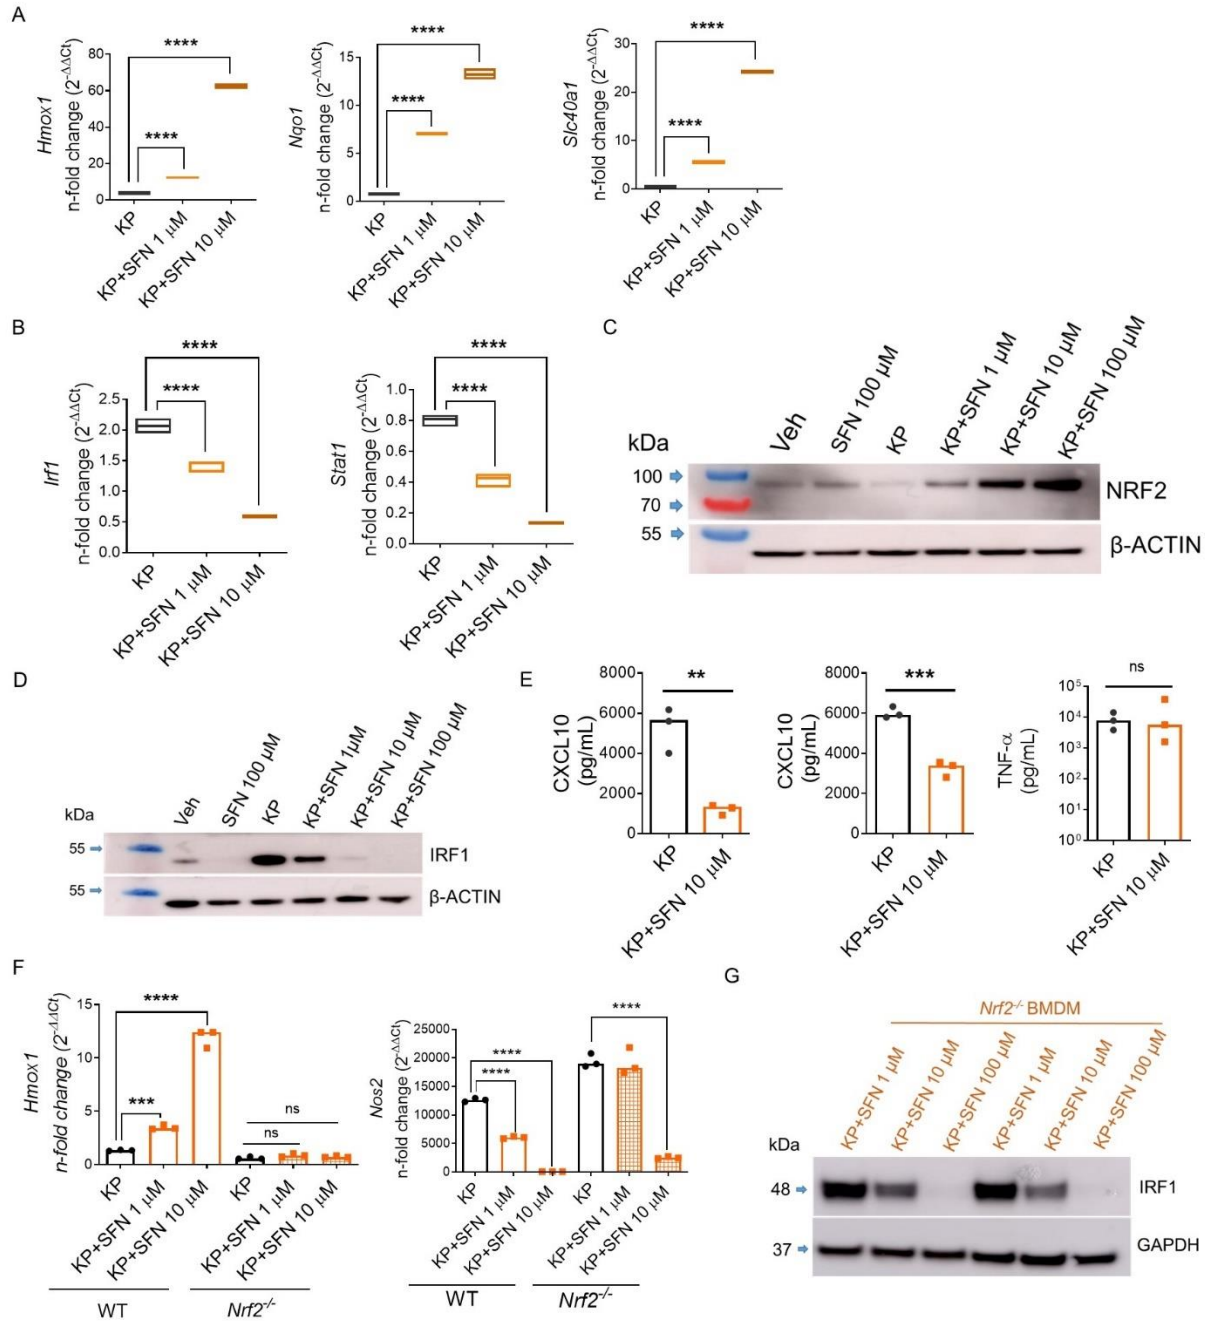

**Figure S10: Sulforaphane phenocopies the effect of heightened RBC disposal in macrophages during *K. pneumoniae* infection even in the absence of NRF2.** (A) NRF2 target genes *Hmox1*, *Nqo1*, *Slc40a1* expression, (B) *Irf1* and *Stat1* gene expression in RAW cells incubated with indicated concentrations of sulforaphane (SFN) for 1 h. Following pre-incubation, cells were challenged with vehicle (PBS) or *Klebsiella pneumoniae* (KP, MOI 10:1) for 4 h. Gene expression was evaluated by qPCR analysis. Fold change relative to vehicle (0.07% ethanol)-treated RAW cells. Floating bar plots indicate median and 25-75%, n=3 technical replicates per group. \*\*\*\* p<0.0001 by two-tailed t test. (C) NRF2 and (D) IRF1 immunoblots in RAW cells challenged with vehicle (PBS), KP, or KP + SFN for 4 h. (E) CCL5, CXCL10, and TNF- $\alpha$  were

**Olonisakin, T et. al**  
**Supplemental figures**

measured in cell culture supernatant by ELISA 4 h post-infection. n=3 technical replicates per group. \*\*p<0.01, \*\*\*\*p<0.0001 by two-tailed t test. (F) *Hmox1* and *Nos2* in *Nrf2*<sup>+/+</sup> and *Nrf2*<sup>-/-</sup> BMDMs challenged with KP or KP + SFN for 4 h. n=3 technical replicates per group, \*\*\*p<0.001 \*\*\*\*p<0.0001 by one-way ANOVA with Tukey's multiple comparisons test. Fold change relative to vehicle (0.07% ethanol)-treated BMDMs. (G) IRF1 immunoblot in *Nrf2*<sup>-/-</sup> BMDMs challenged with KP + increasing concentrations of SFN for 4 h.

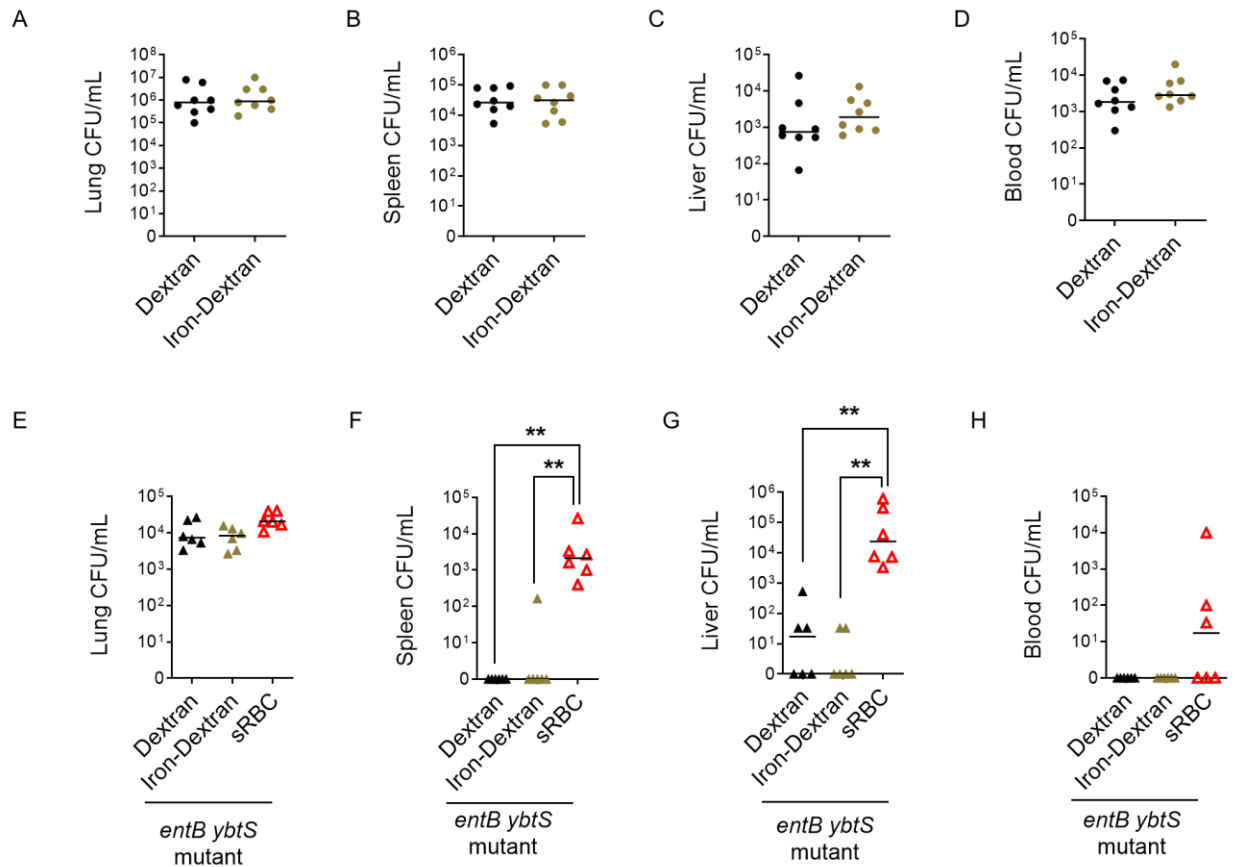

**Figure S11: Iron dextran delivery does not promote *K. pneumoniae* extrapulmonary proliferation.** (A–D) KP was instilled intratracheally into C57BL/6 mice and followed by transfusion of dextran or iron dextran (total 200  $\mu$ g iron). Bacterial burden is shown as CFU/mL in (A) lung, (B) spleen, (C) liver homogenates, and (D) blood at 24 hours. Each point indicates individual mice, n=8 per group, line indicates the median, no statistical significance by Mann-Whitney U two-tailed test. (E–H) *EntB ybtS* KP mutant lacking siderophore production was instilled intratracheally into C57BL/6 mice and followed by transfusion of dextran or iron dextran (total 200  $\mu$ g iron) or sRBC. Bacterial burden is shown as CFU/mL in (E) lung, (F) spleen, (G) liver homogenates, and (H) blood at 24 hours. Each point indicates individual mice. Line indicates median. n=6 per group, \*p<0.05, \*\*p<0.01, by Kruskal-Wallis test with Dunn's multiple comparisons.

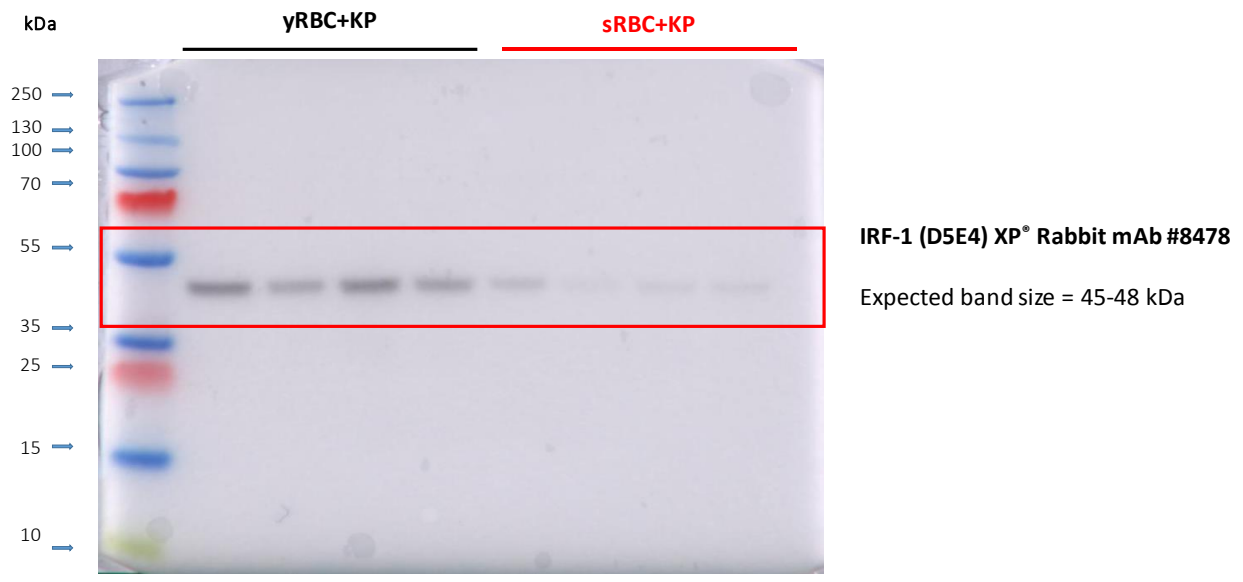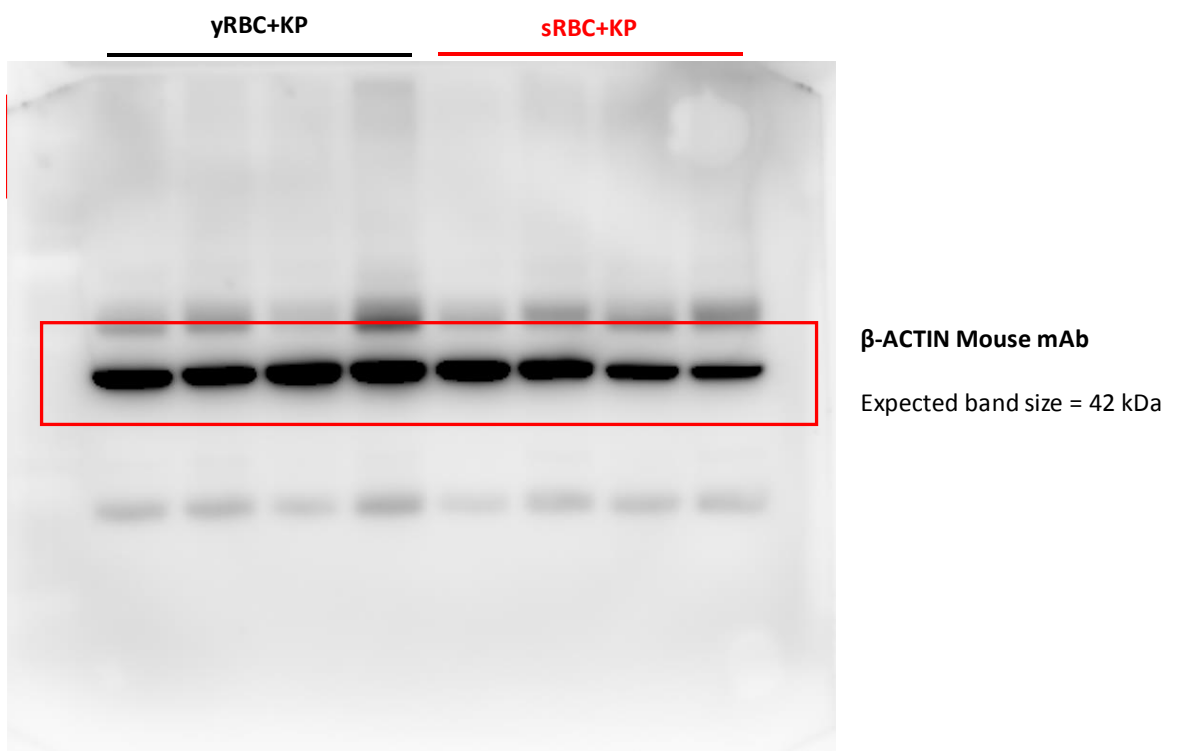

**Figure 3C: Full unedited blots. Red rectangle indicates depicted image.**

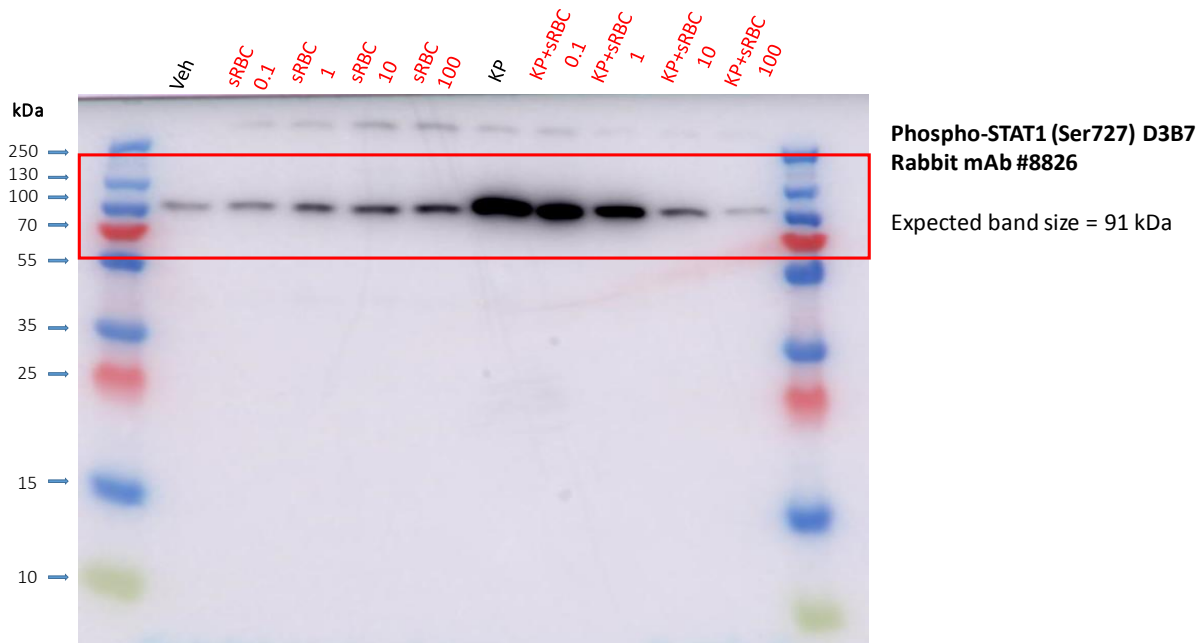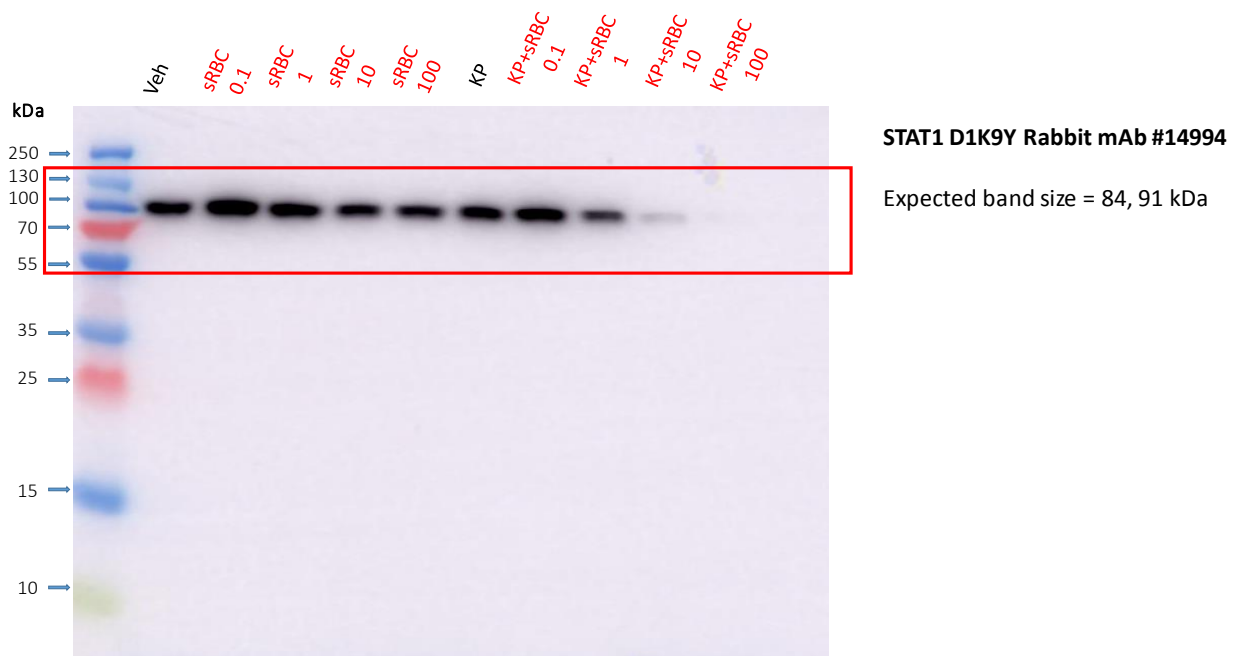

**Figure 4G: Full unedited blots. Red rectangle indicates depicted image.**

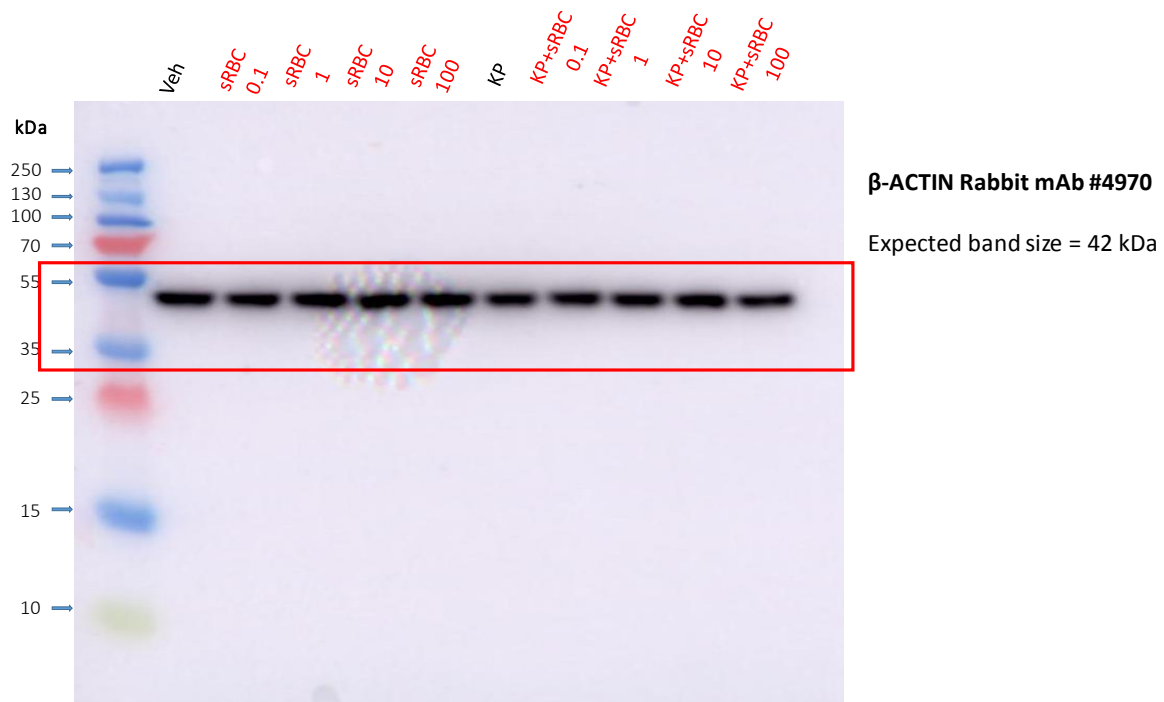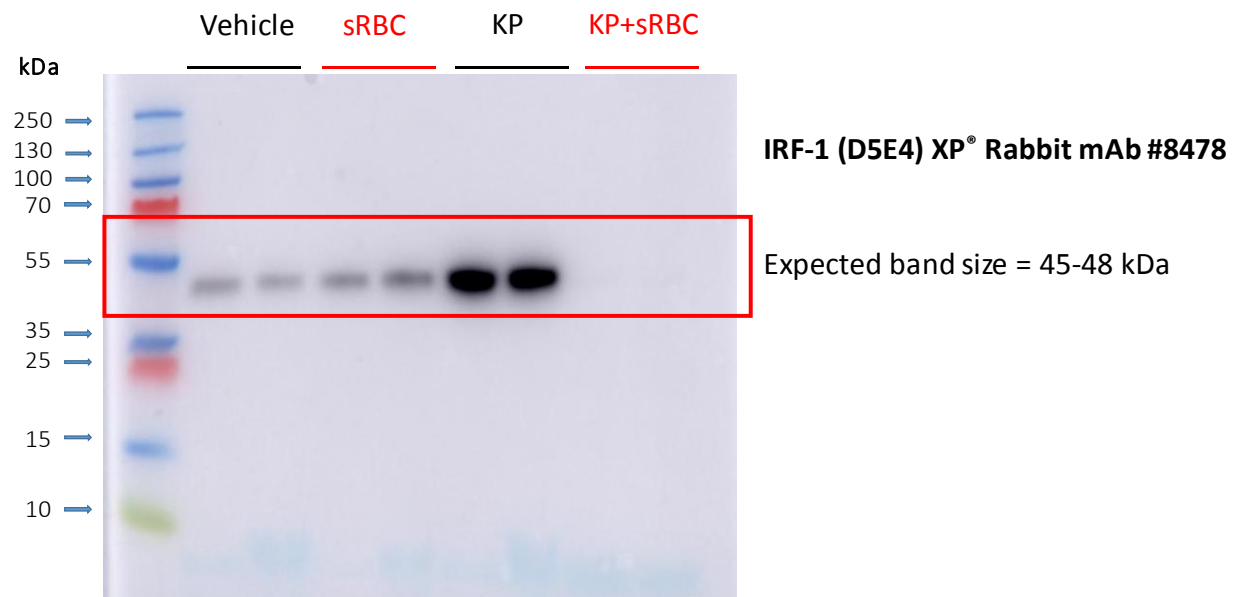

**Figure 4G: Full unedited blots. Red rectangle indicates depicted image.**



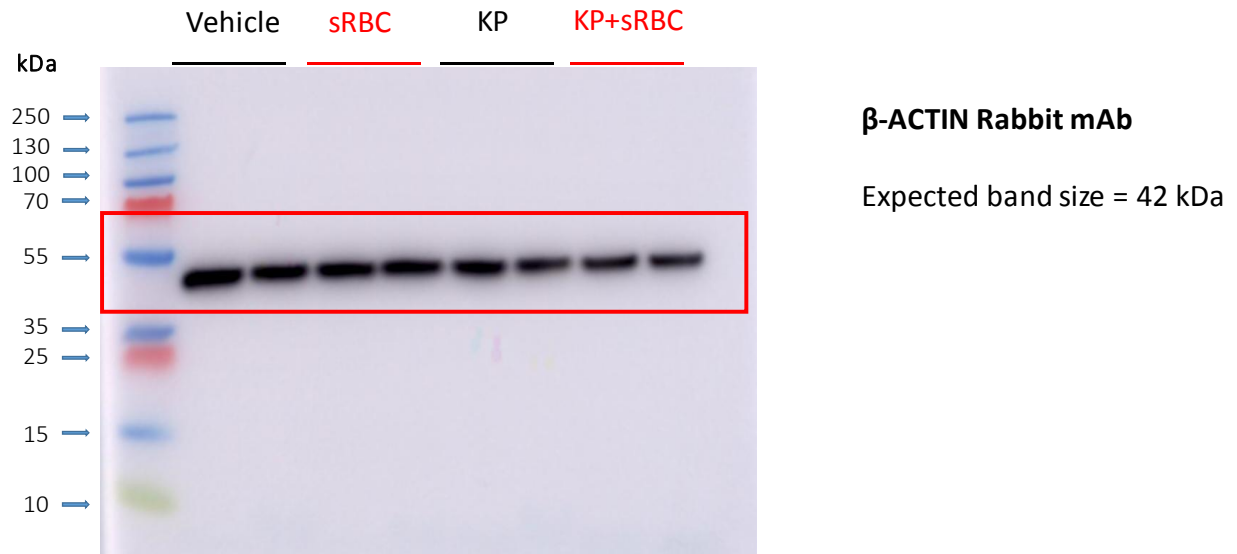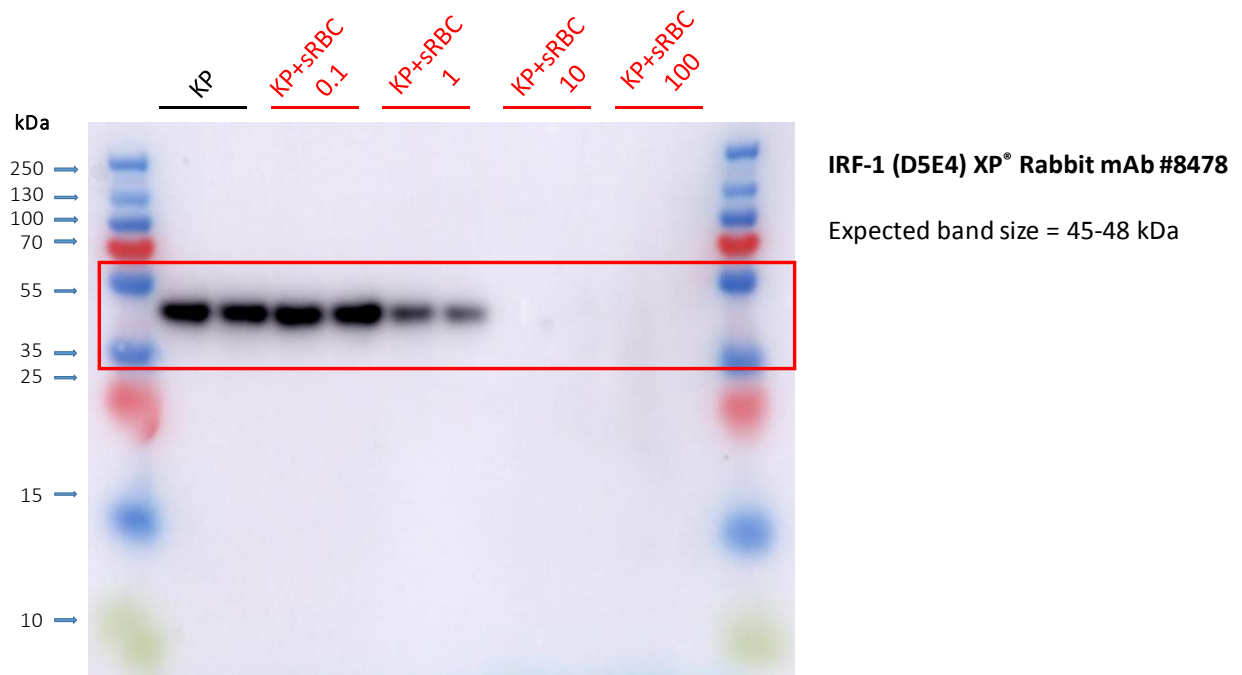

**Figure 4G: Full unedited blots. Red rectangle indicates depicted image.**

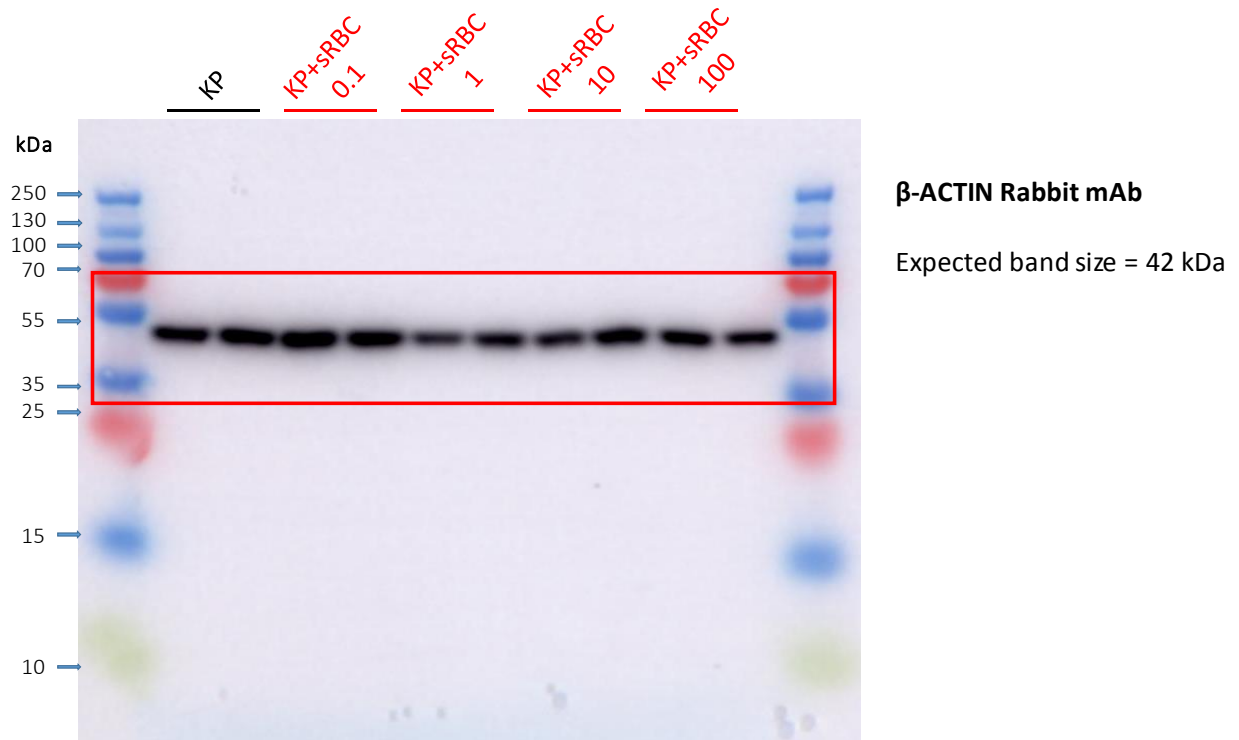

**Figure 4G: Full unedited blots. Red rectangle indicates depicted image.**

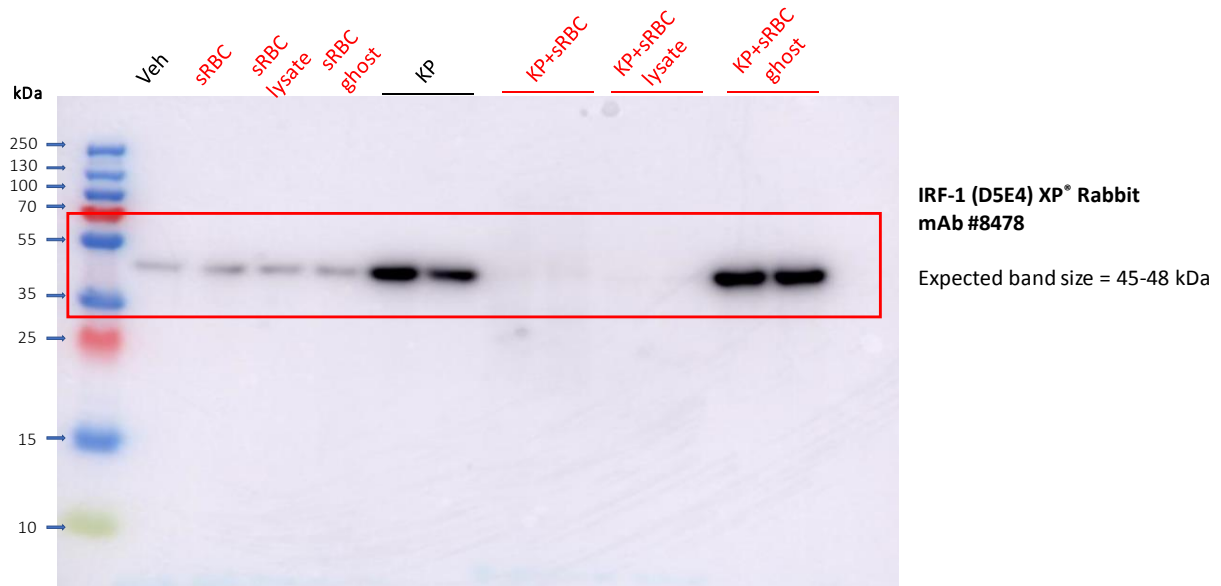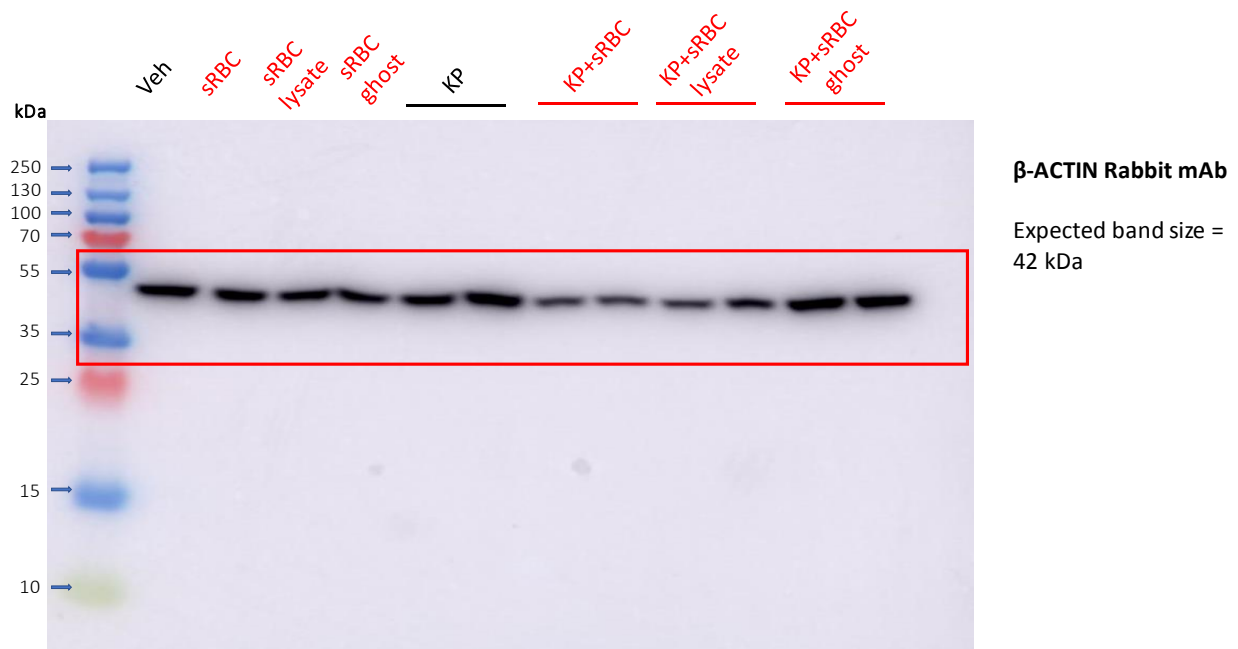

**Figure 5A: Full unedited blots. Red rectangle indicates depicted image.**

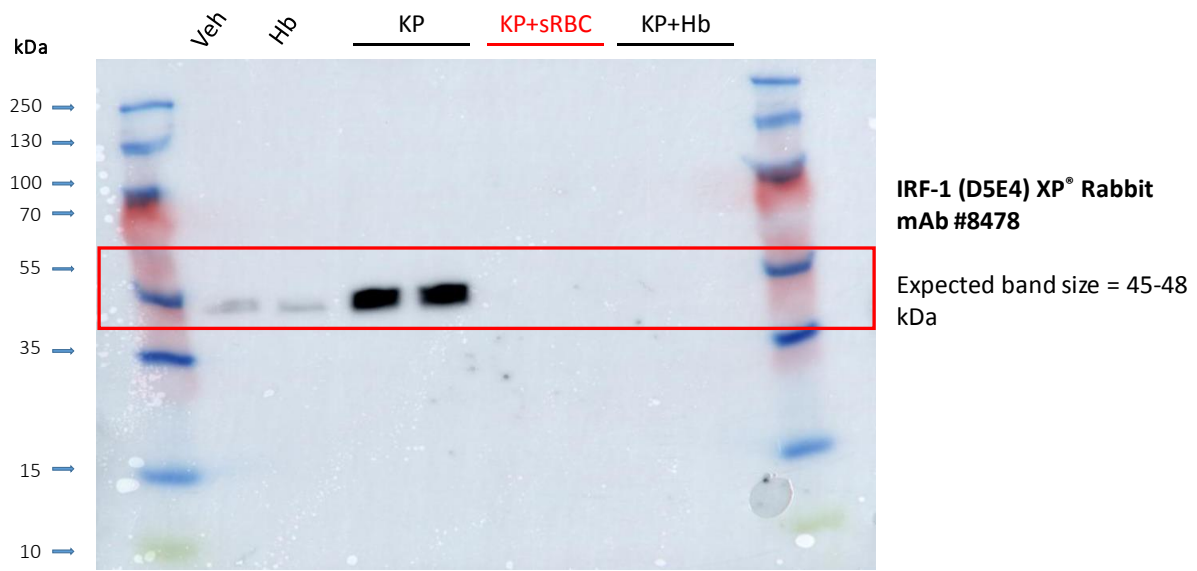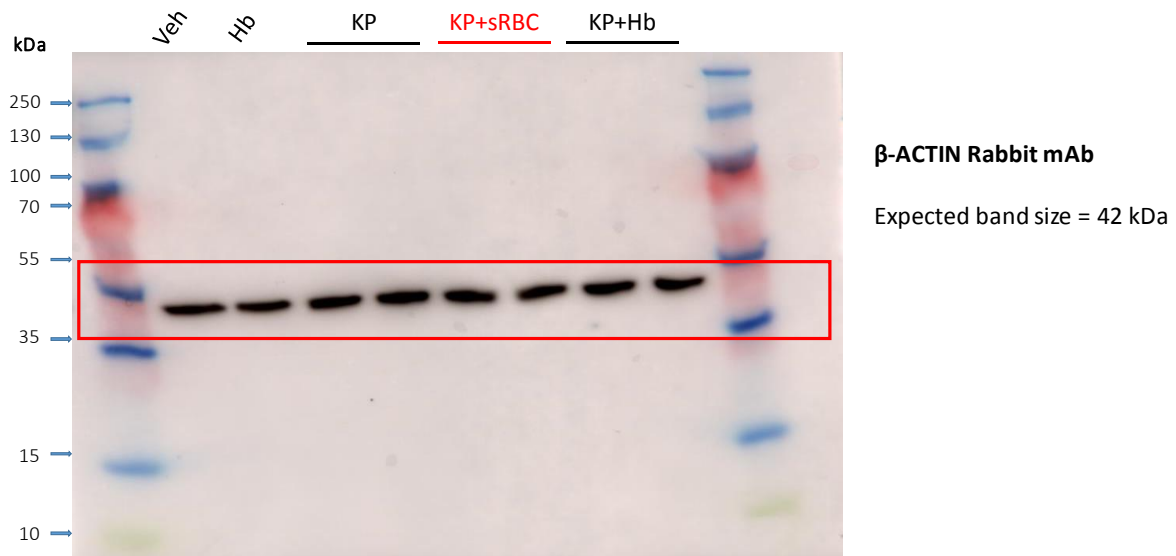

**Figure 5B: Full unedited blots. Red rectangle indicates depicted image.**

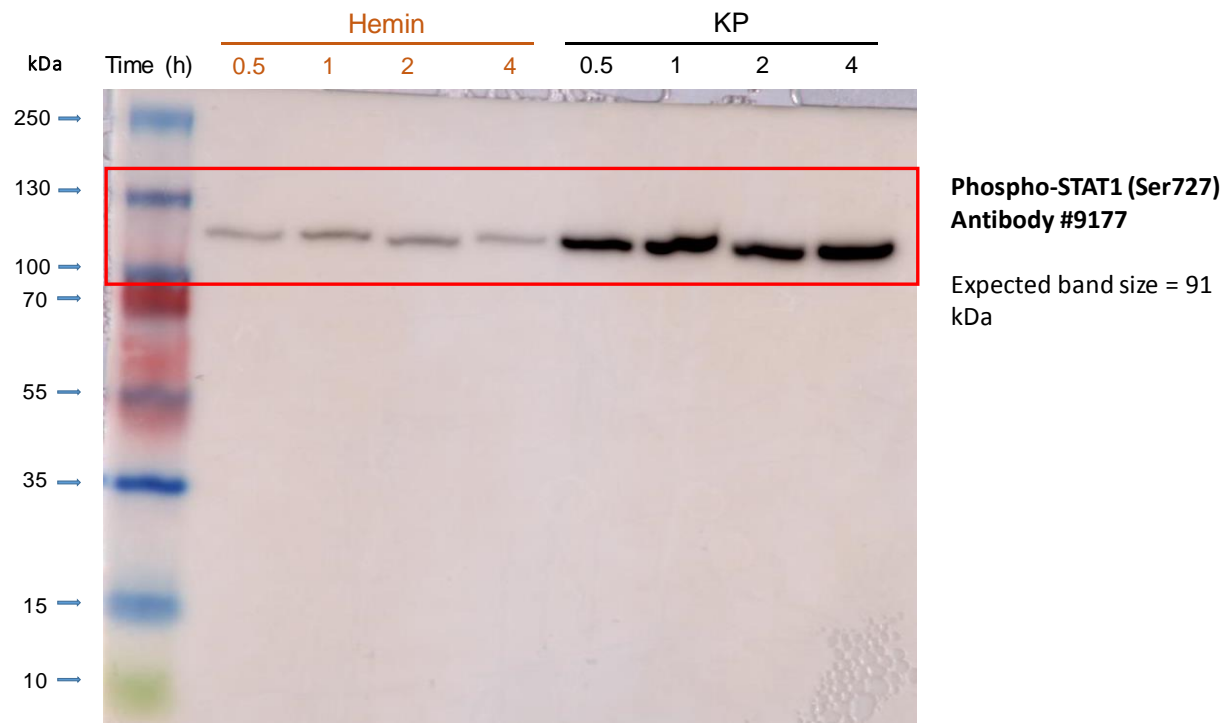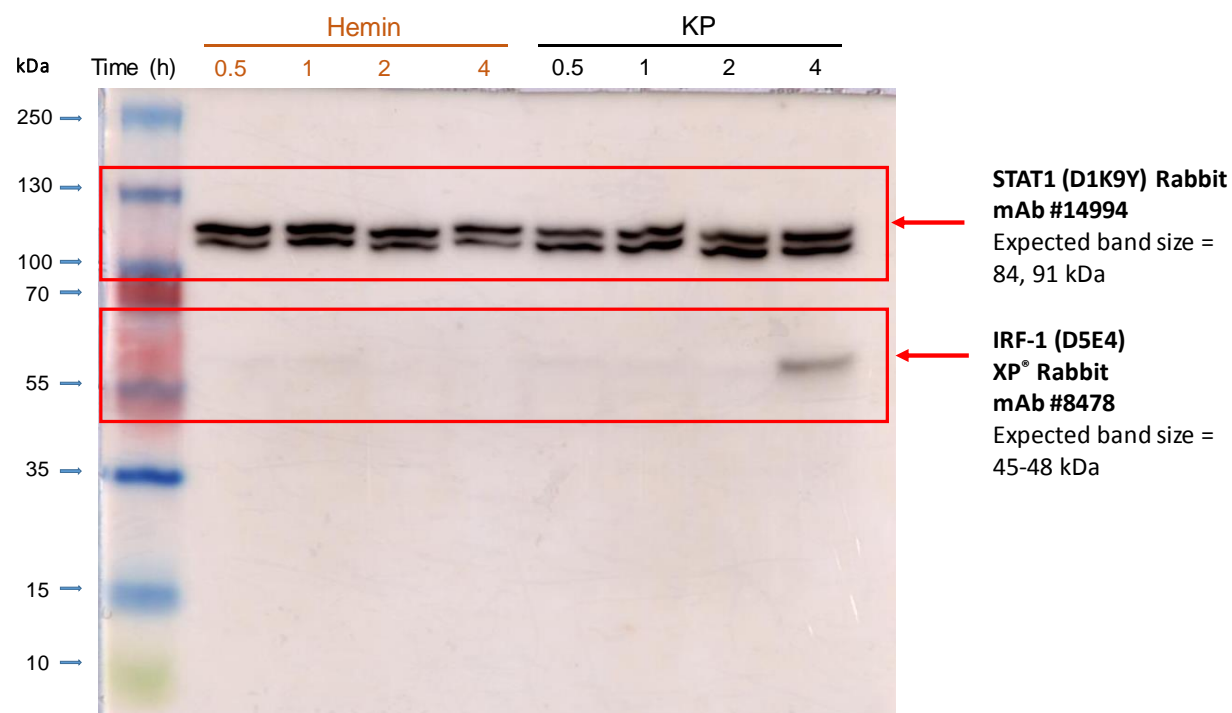

**Figure 5C: Full unedited blots. Red rectangle indicates depicted image.**

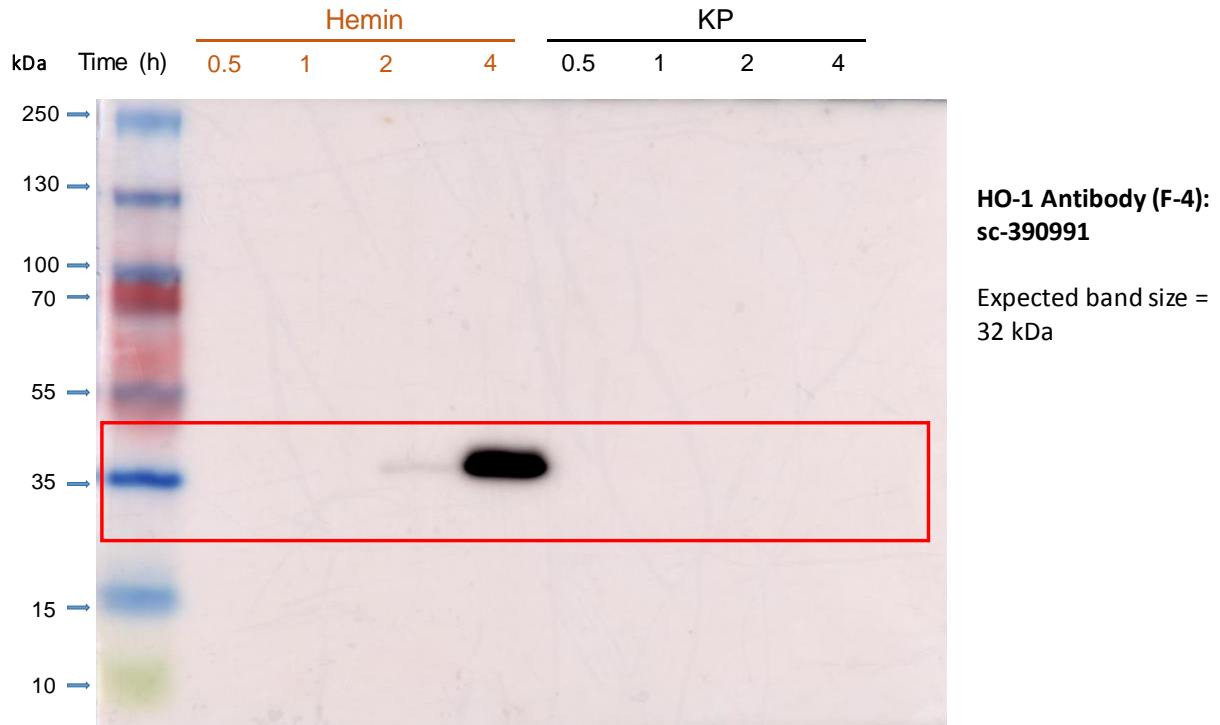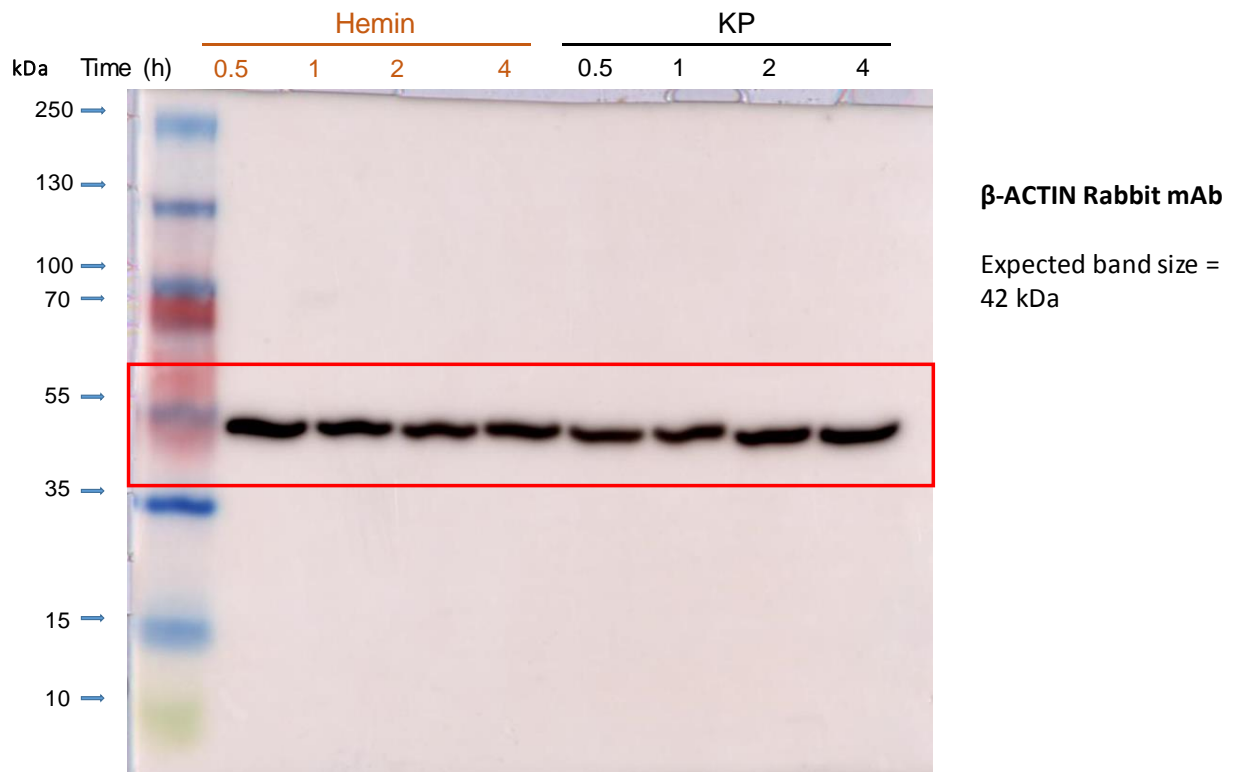

**Figure 5C: Full unedited blots. Red rectangle indicates depicted image.**

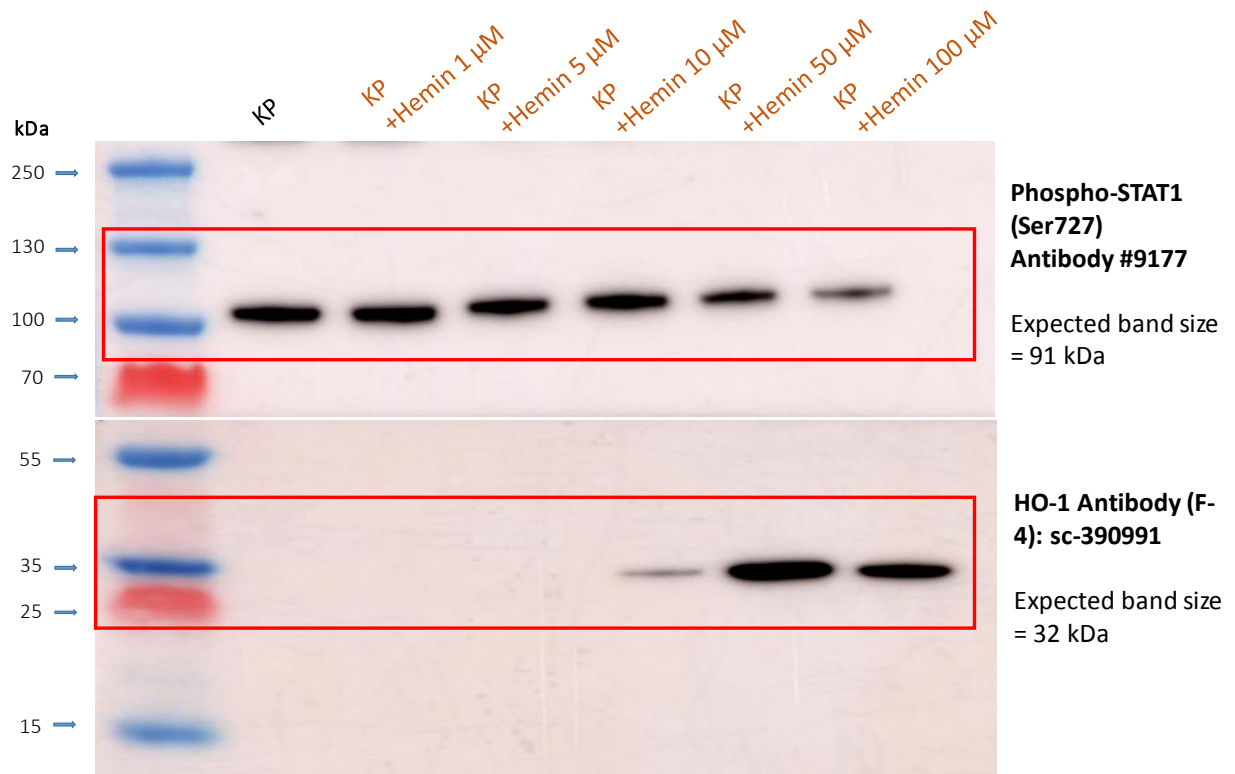

**Figure 5D: Full unedited blots. Red rectangle indicates depicted image.**

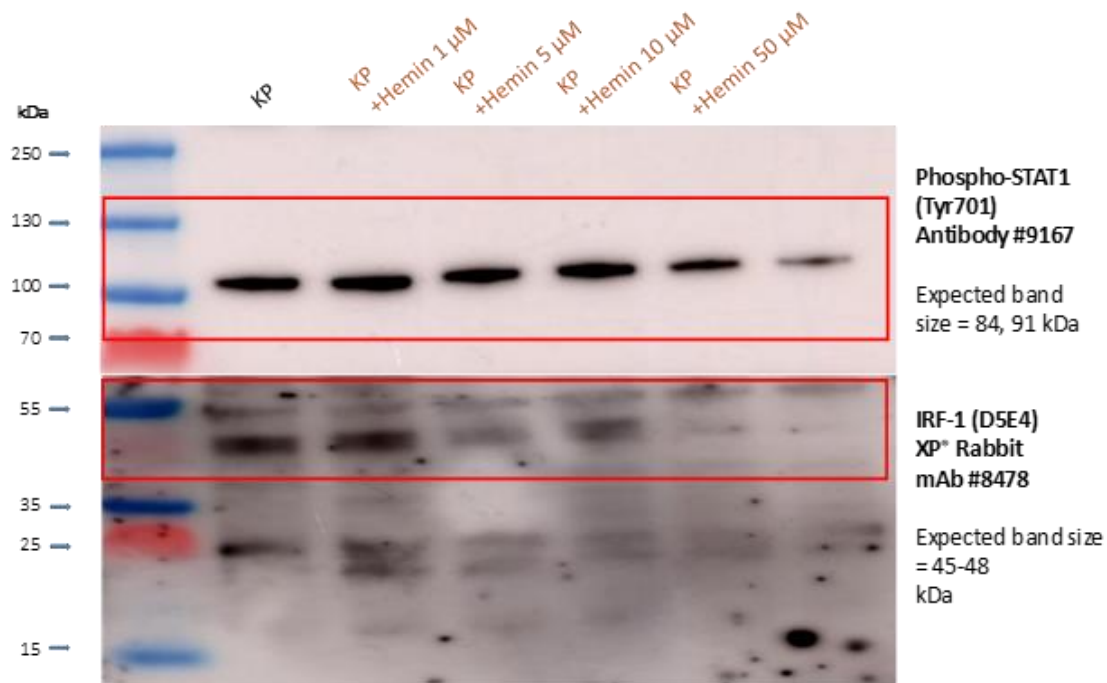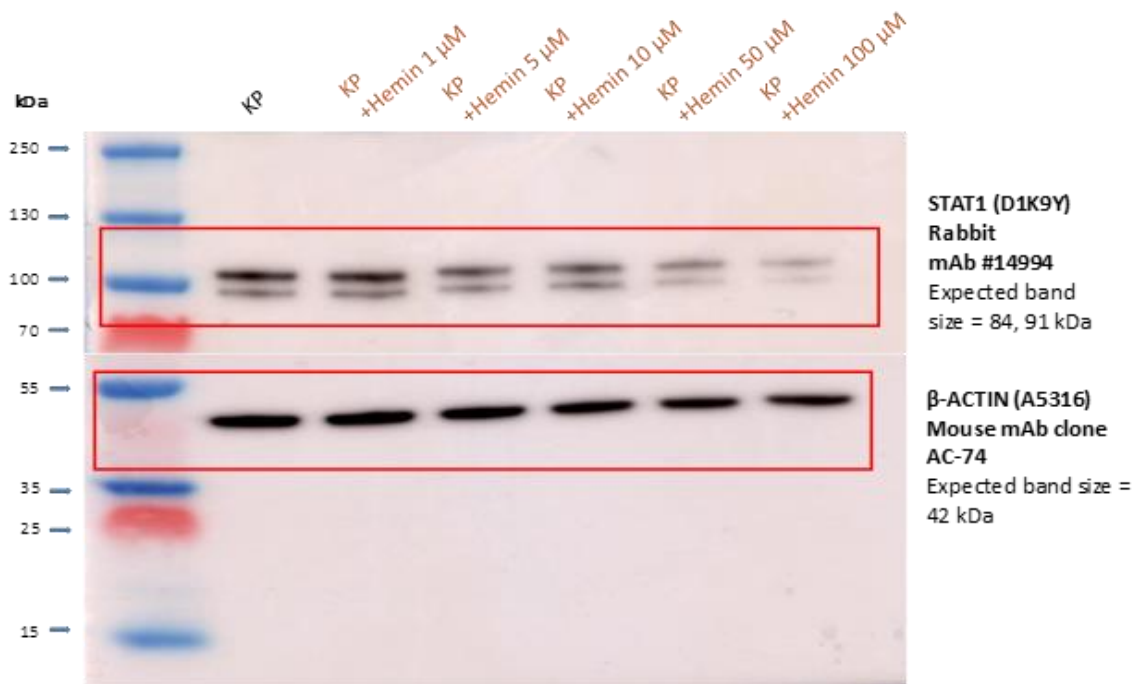

**Figure 5D: Full unedited blots. Red rectangle indicates depicted image.**



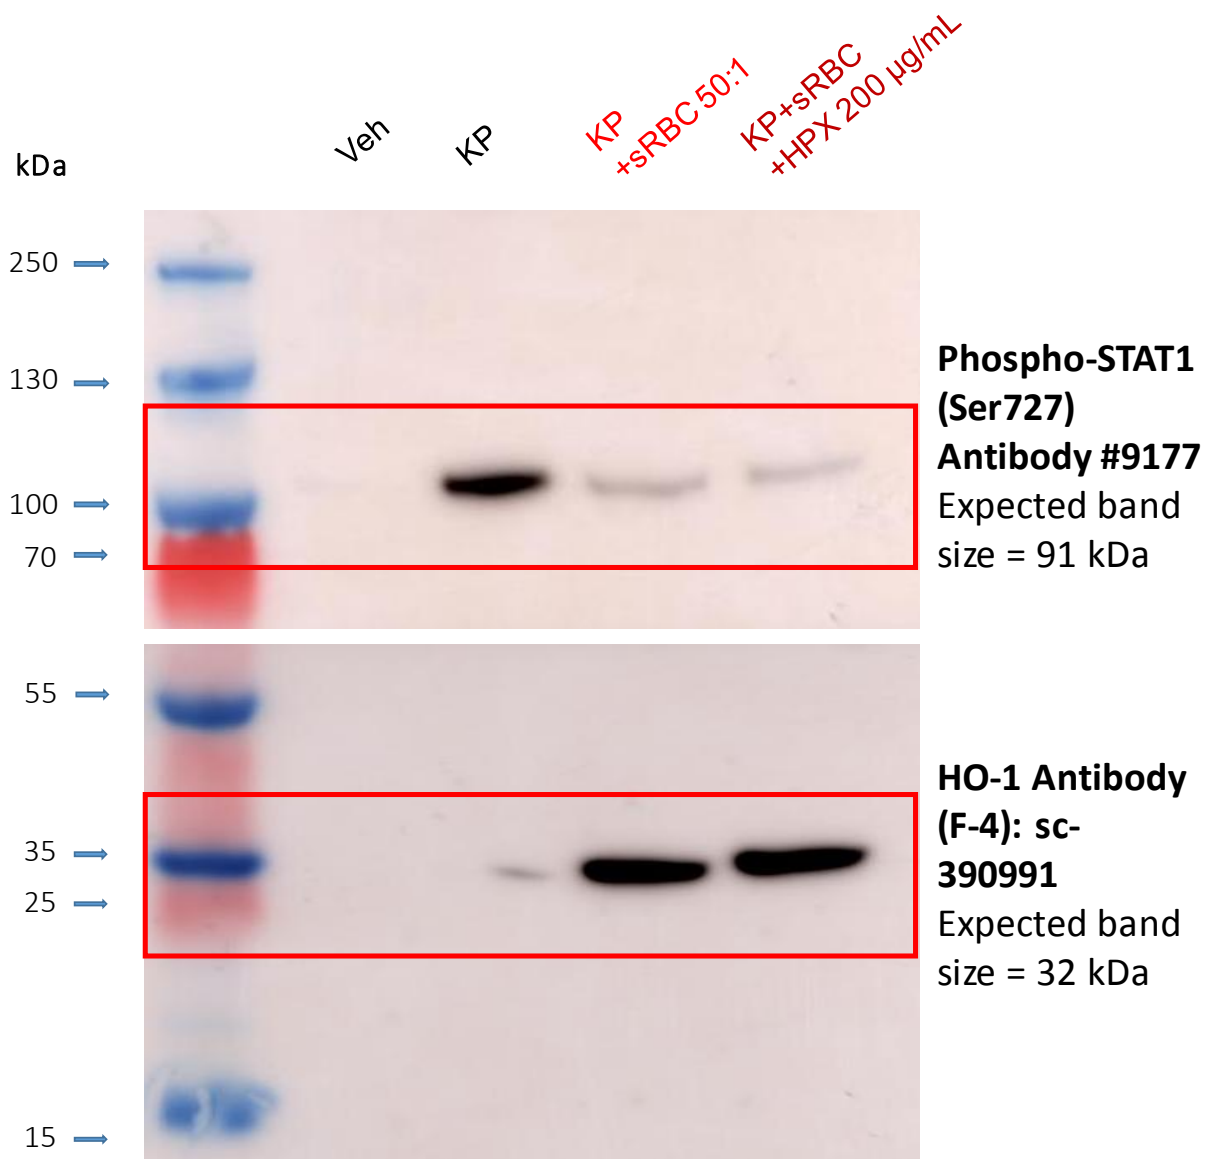

**Figure 5F: Full unedited blots. Red rectangle indicates depicted image.**

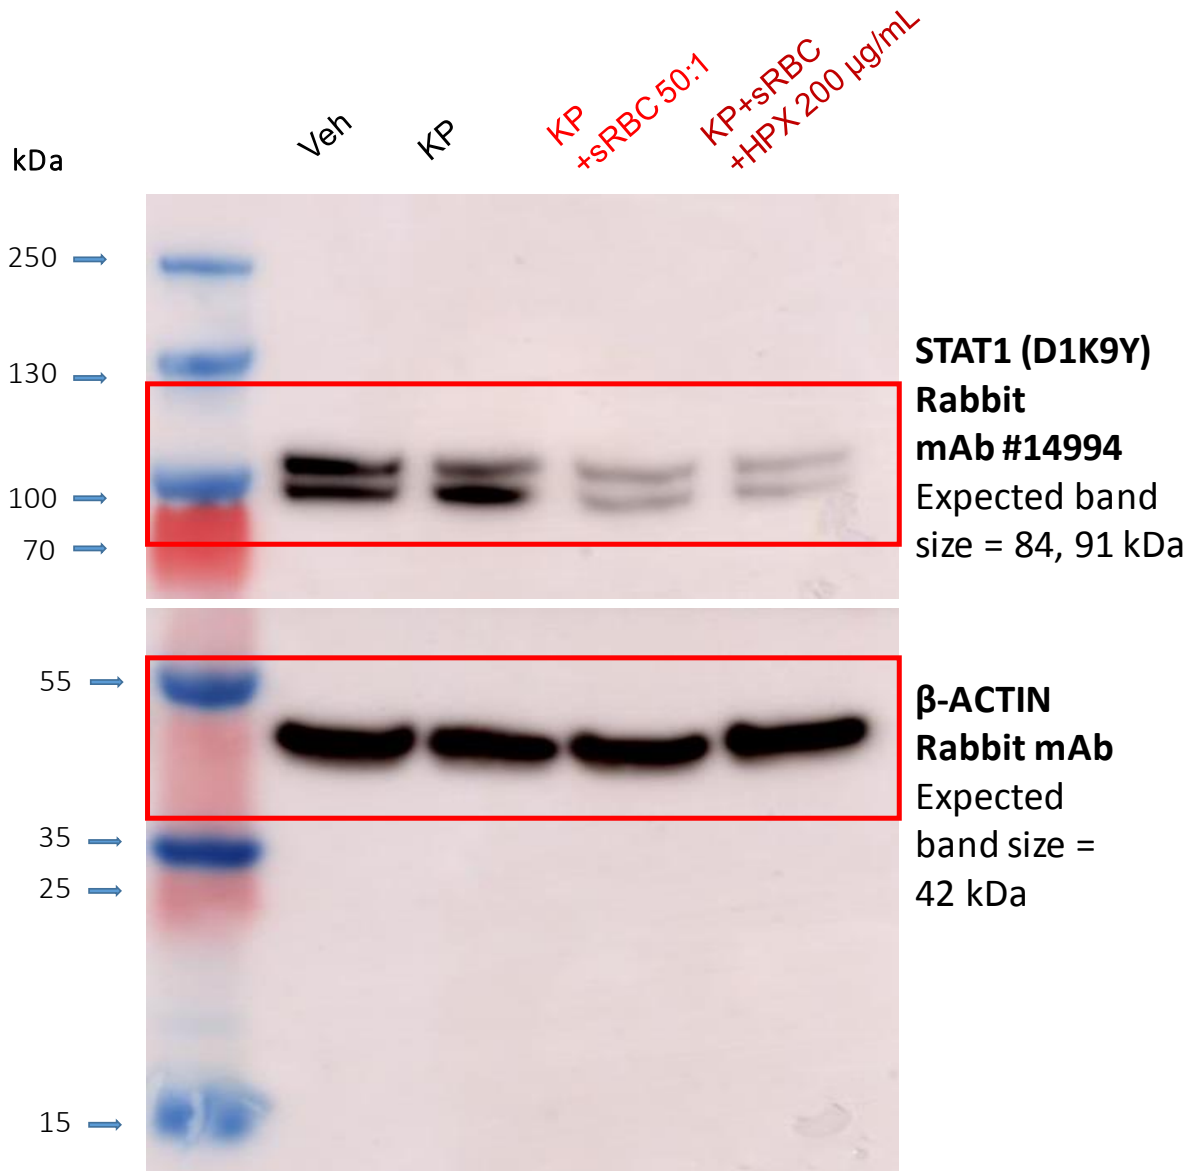

**Figure 5F: Full unedited blots. Red rectangle indicates depicted image.**

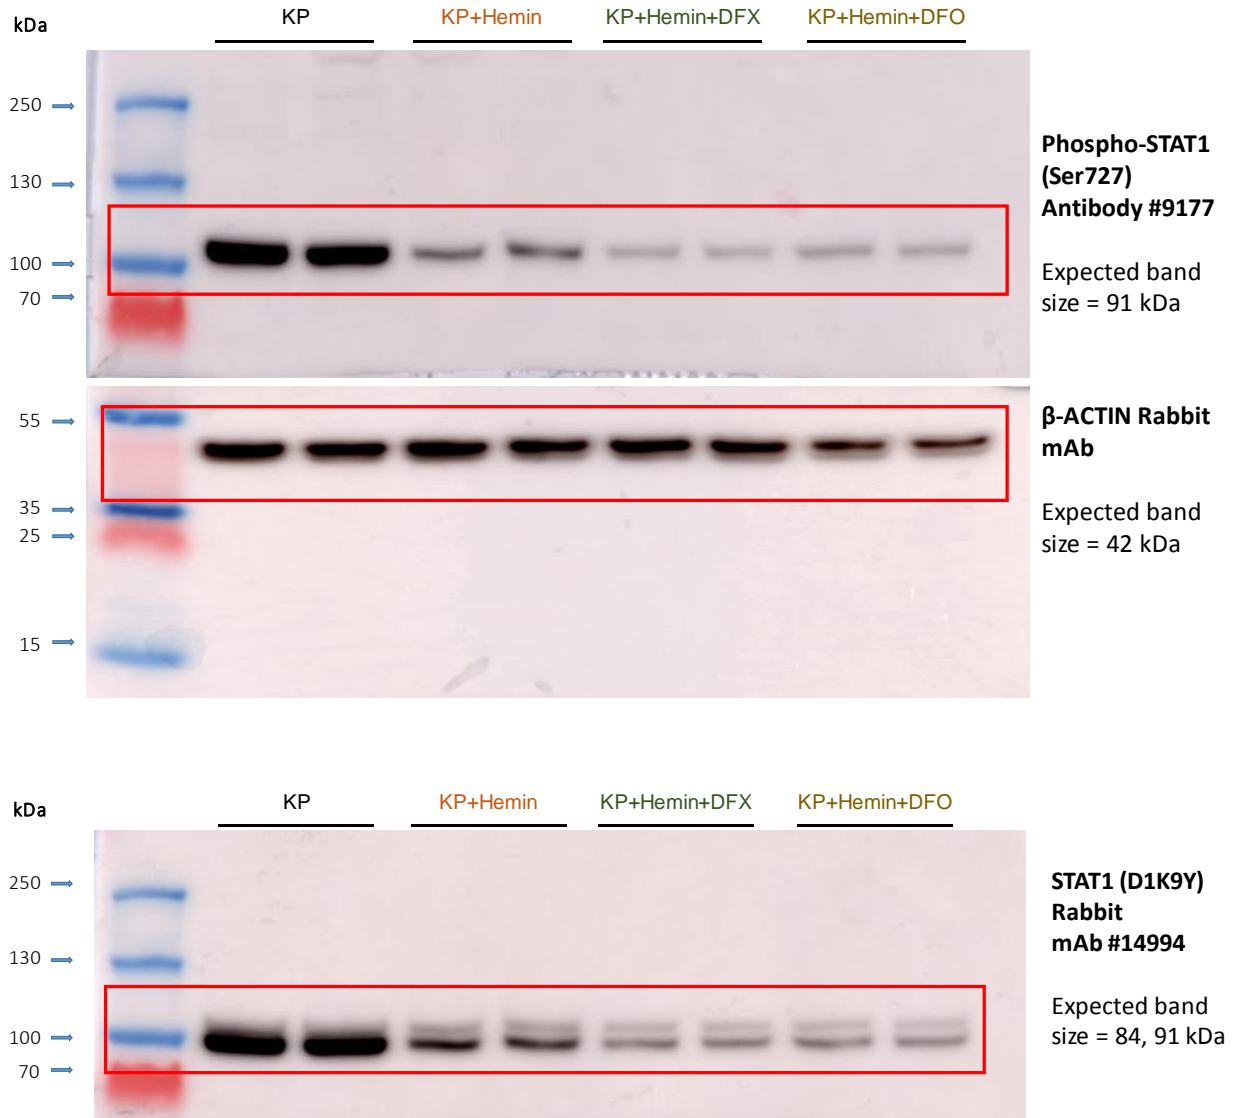

**Figure 7A: Full unedited blots. Red rectangle indicates depicted image.**

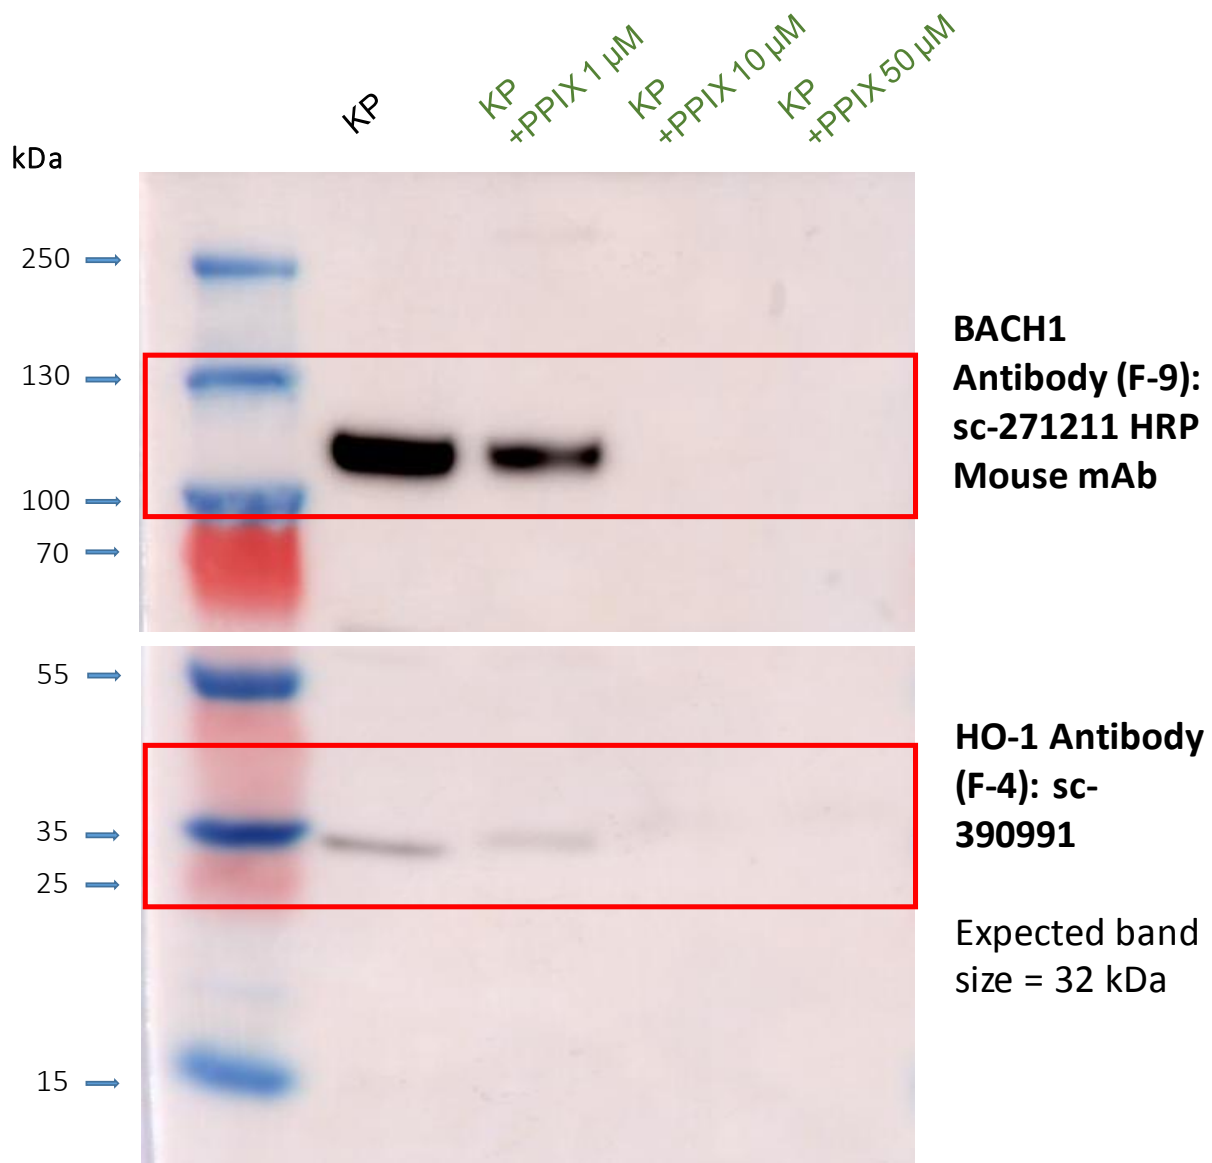

**Figure 7G: Full unedited blots. Red rectangle indicates depicted image.**

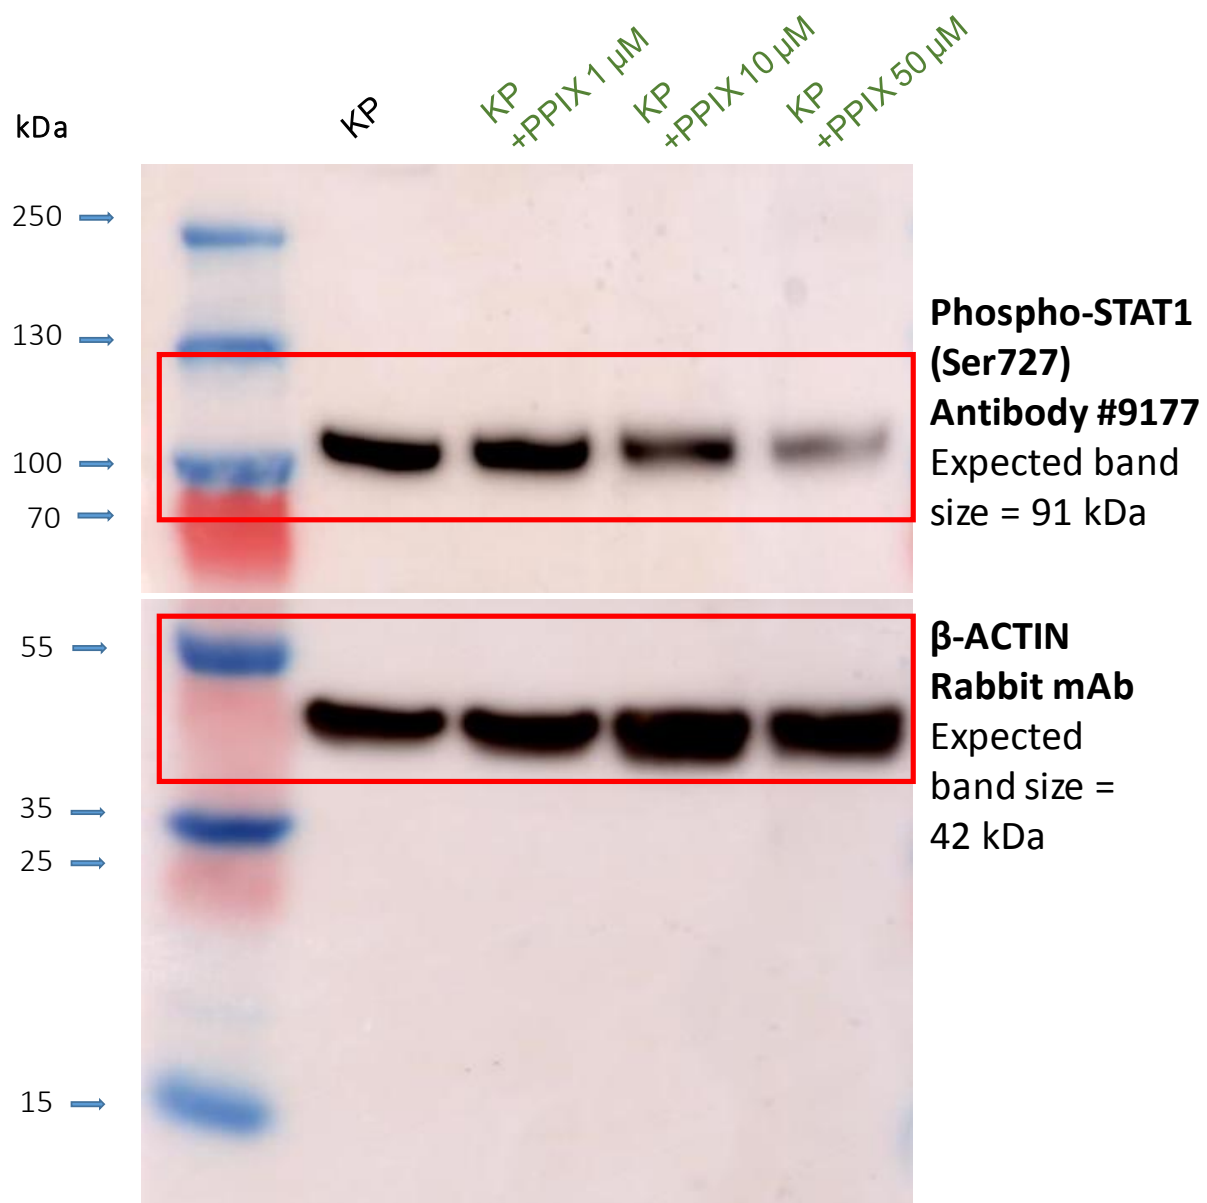

**Figure 7G: Full unedited blots. Red rectangle indicates depicted image.**

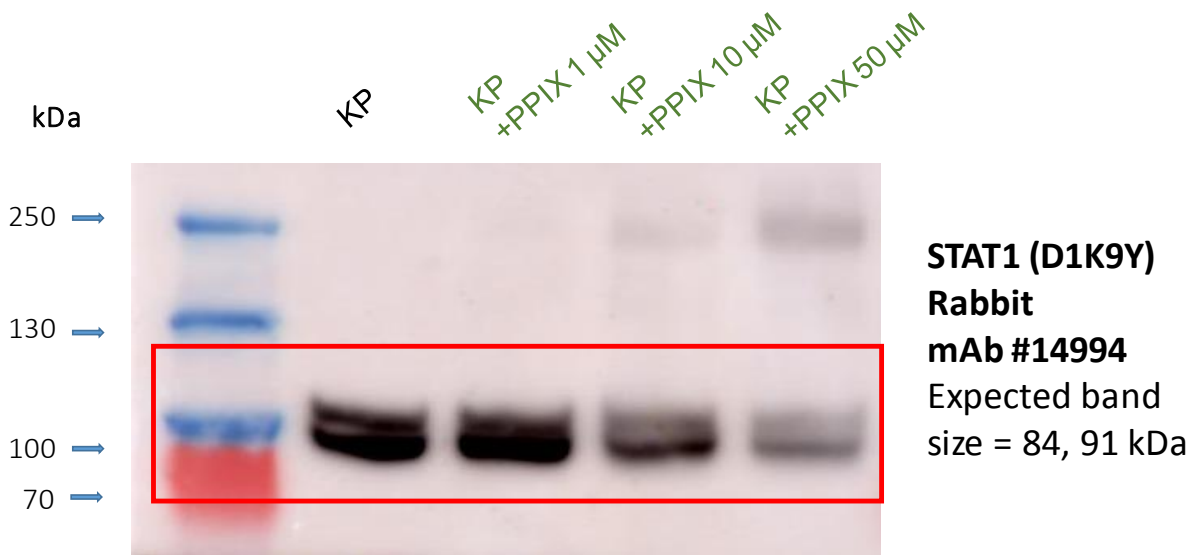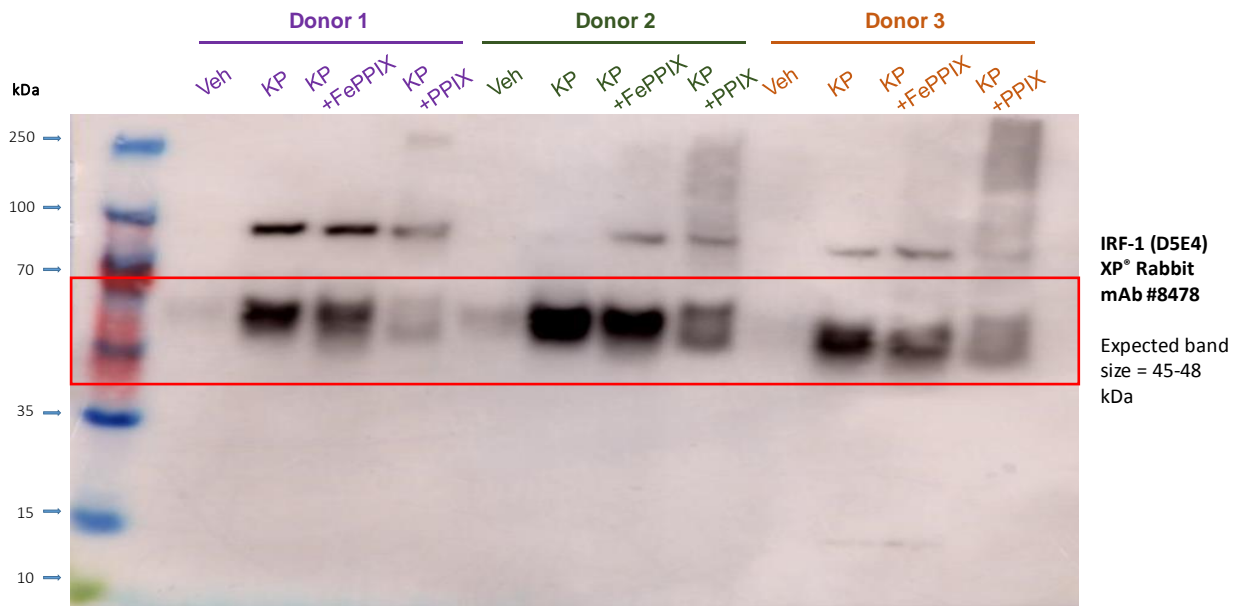

**Figure 7H: Full unedited blots. Red rectangle indicates depicted image.**

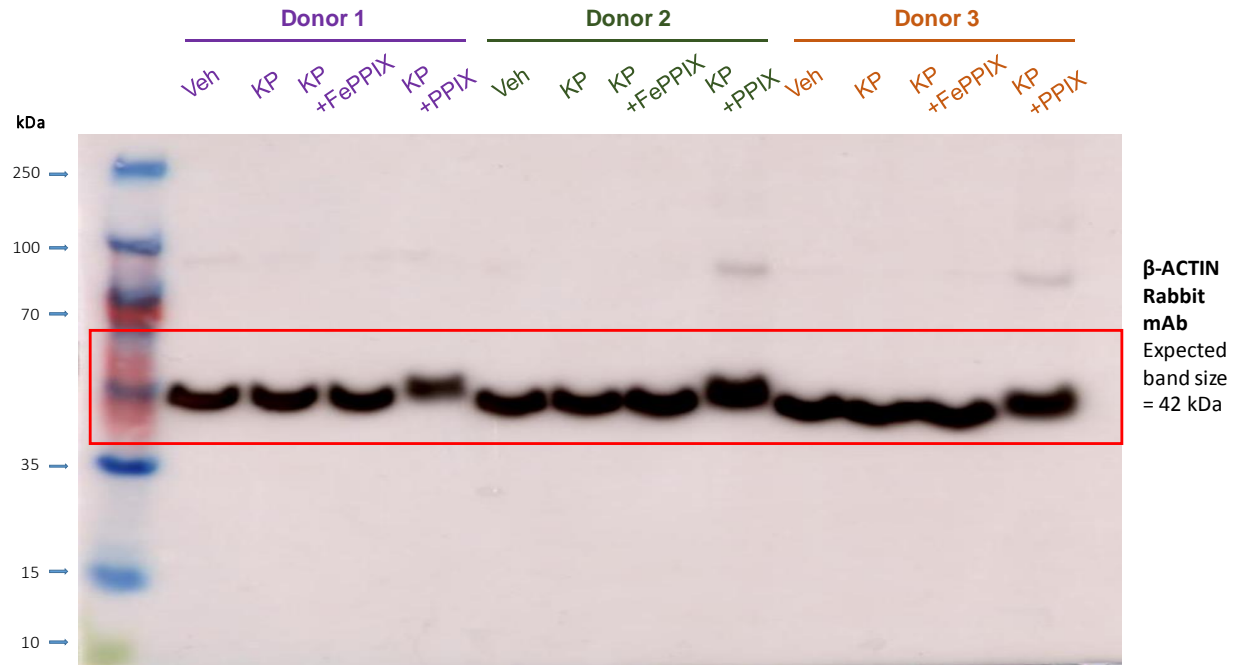

Figure 7H: Full unedited blots. Red rectangle indicates depicted image.

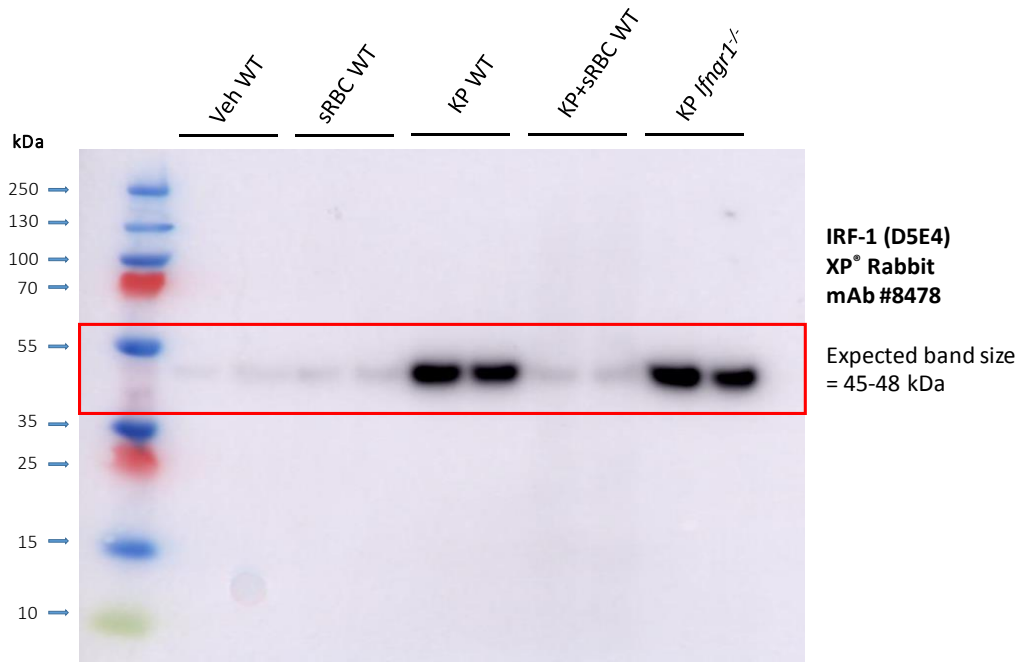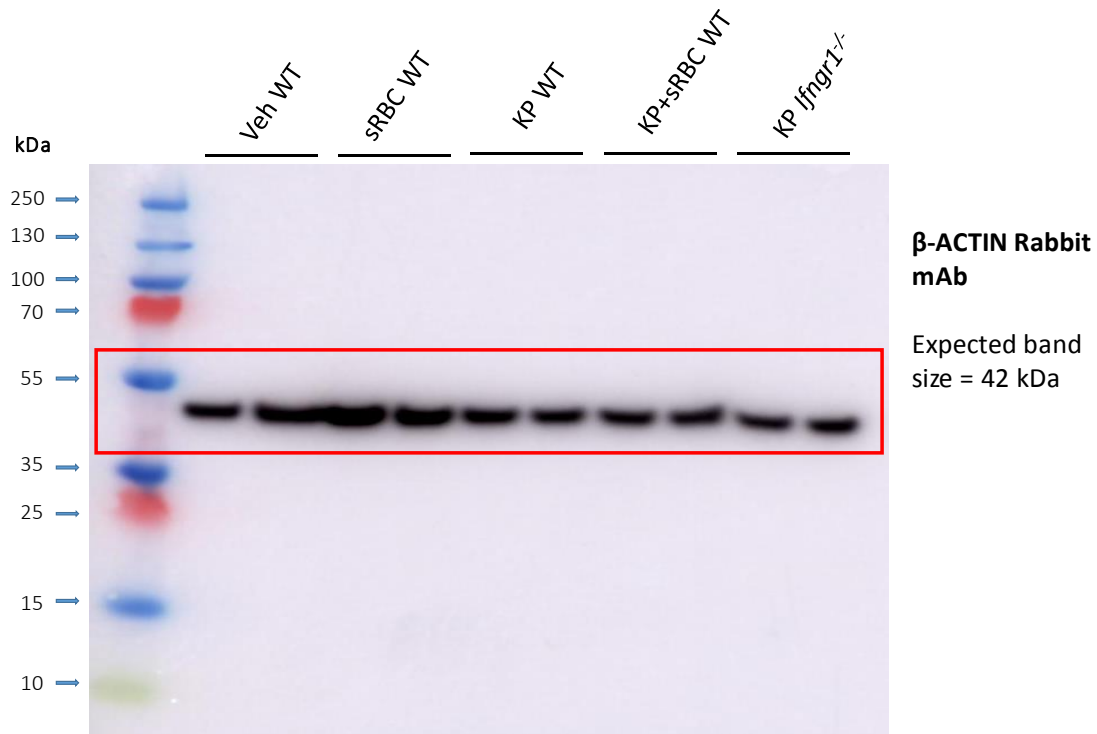

**Supplemental Figure S7B: Full unedited blots. Red rectangle indicates depicted image.**



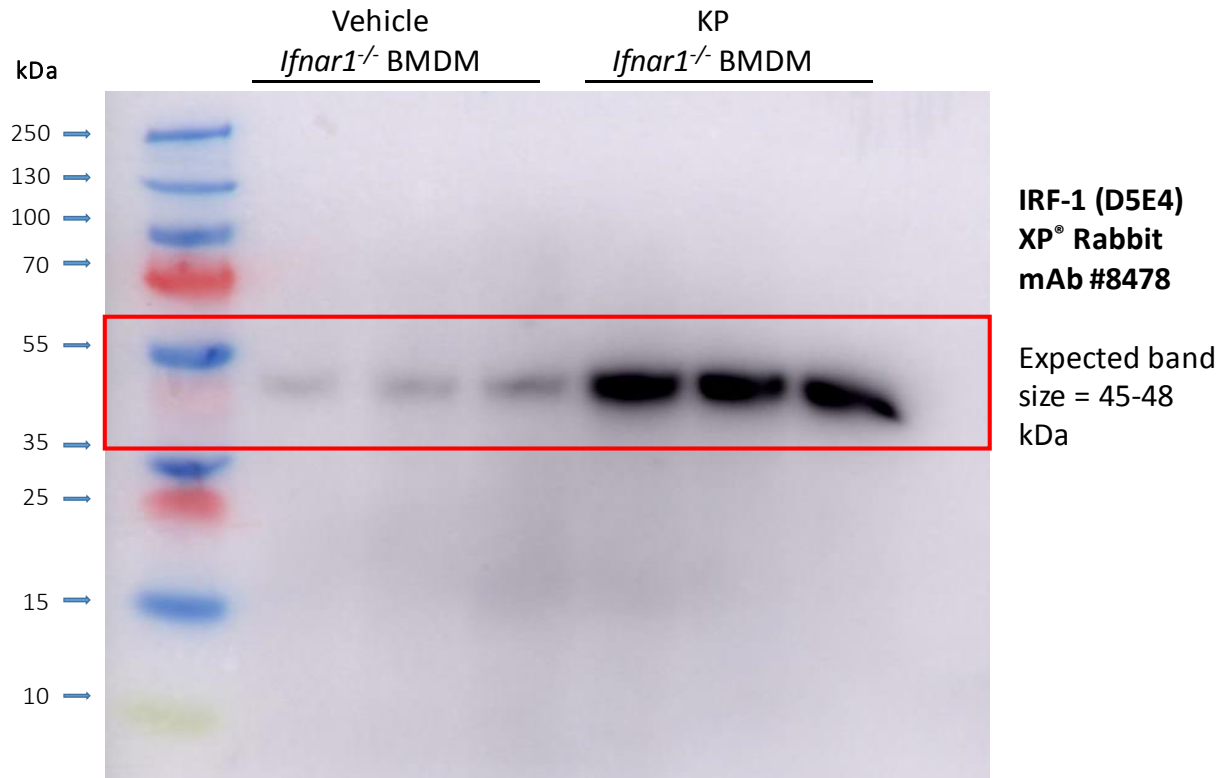

**Supplemental Figure S7C: Full unedited blots. Red rectangle indicates depicted image.**

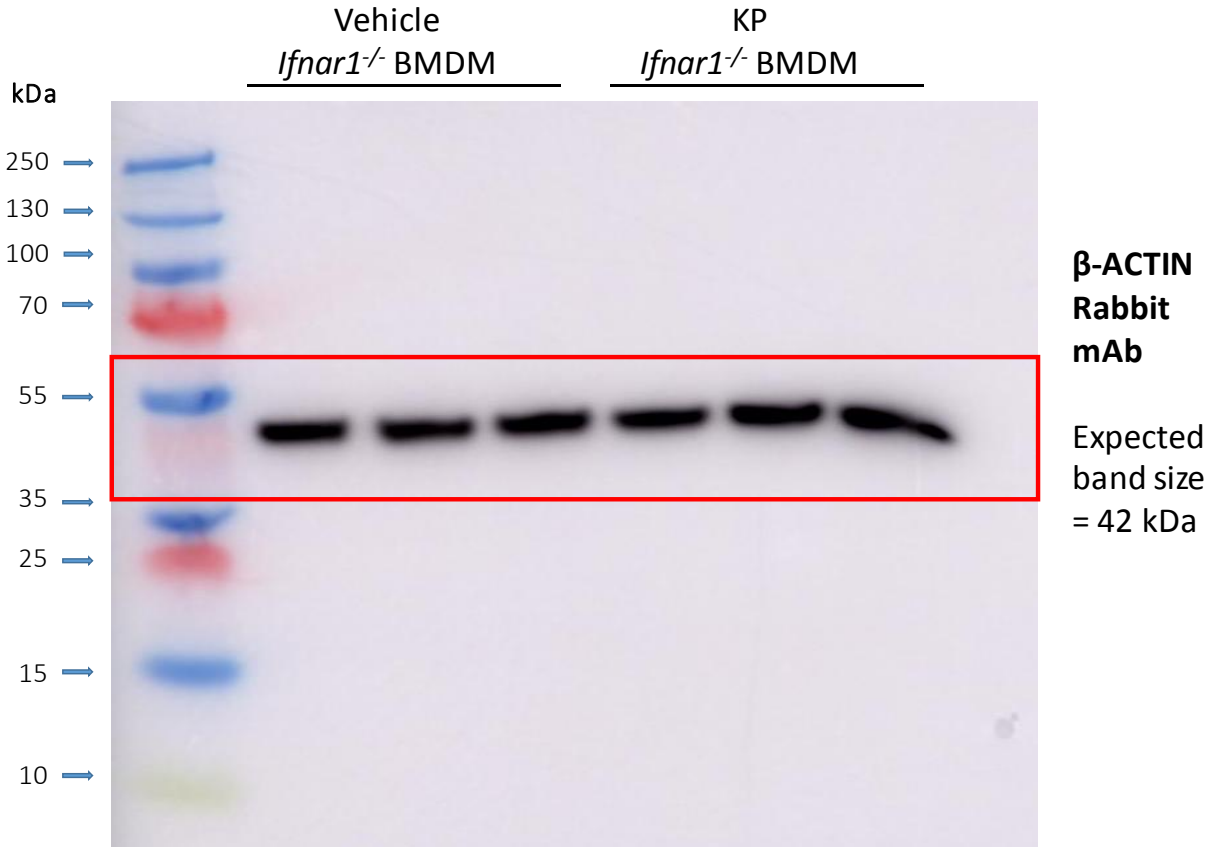

**Supplemental Figure S7C: Full unedited blots. Red rectangle indicates depicted image.**

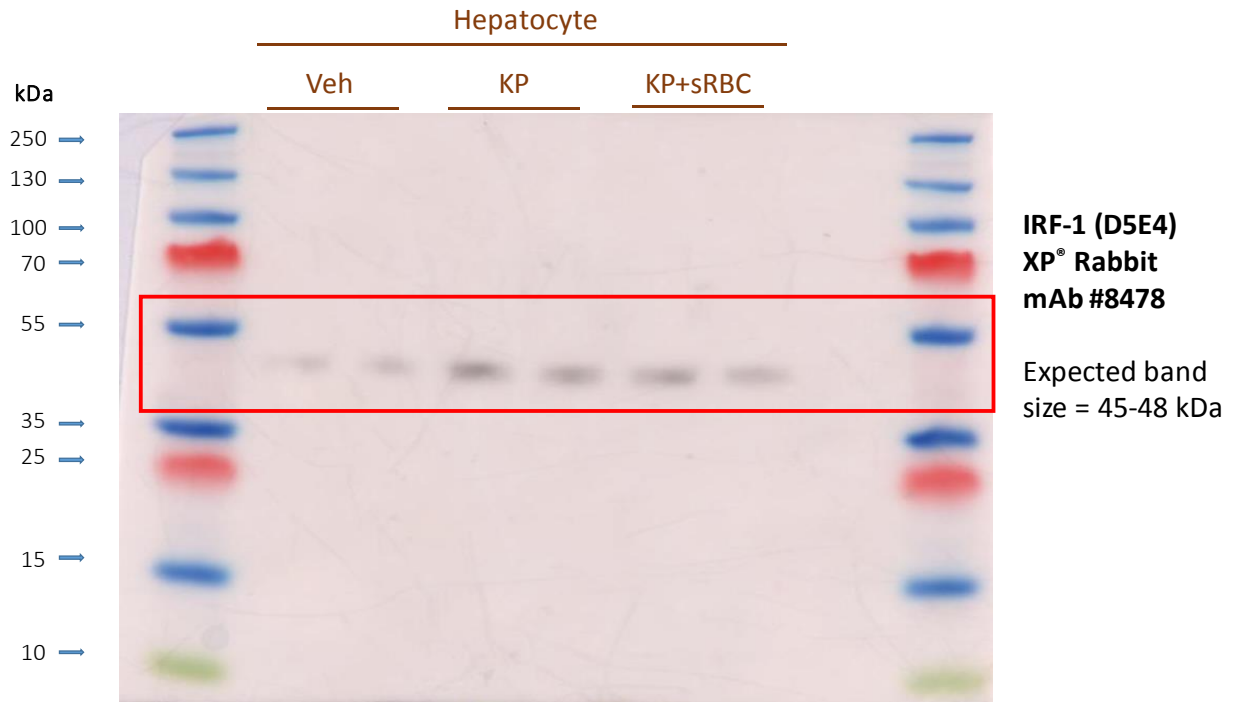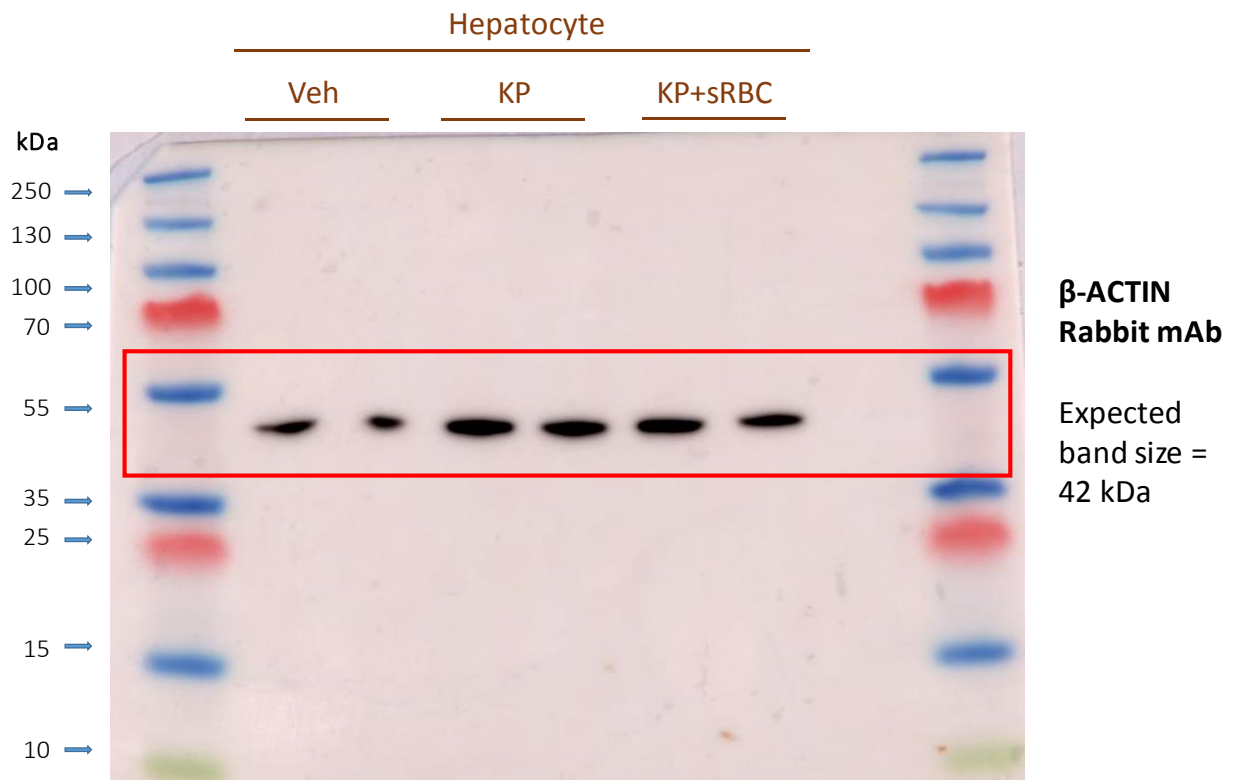

**Supplemental Figure S7D: Full unedited blots. Red rectangle indicates depicted image.**

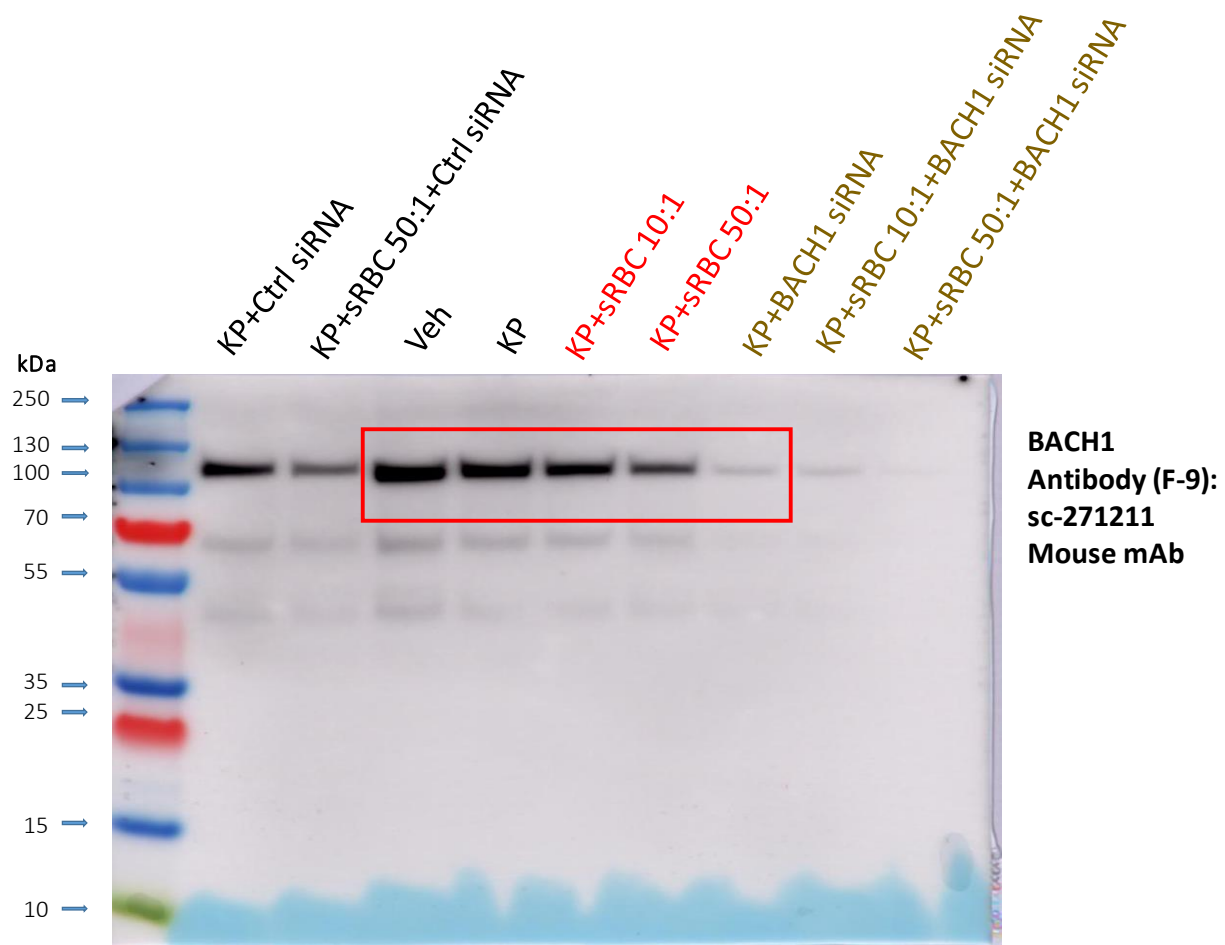

**Supplemental Figure S9A: Full unedited blots. Red rectangle indicates depicted image.**

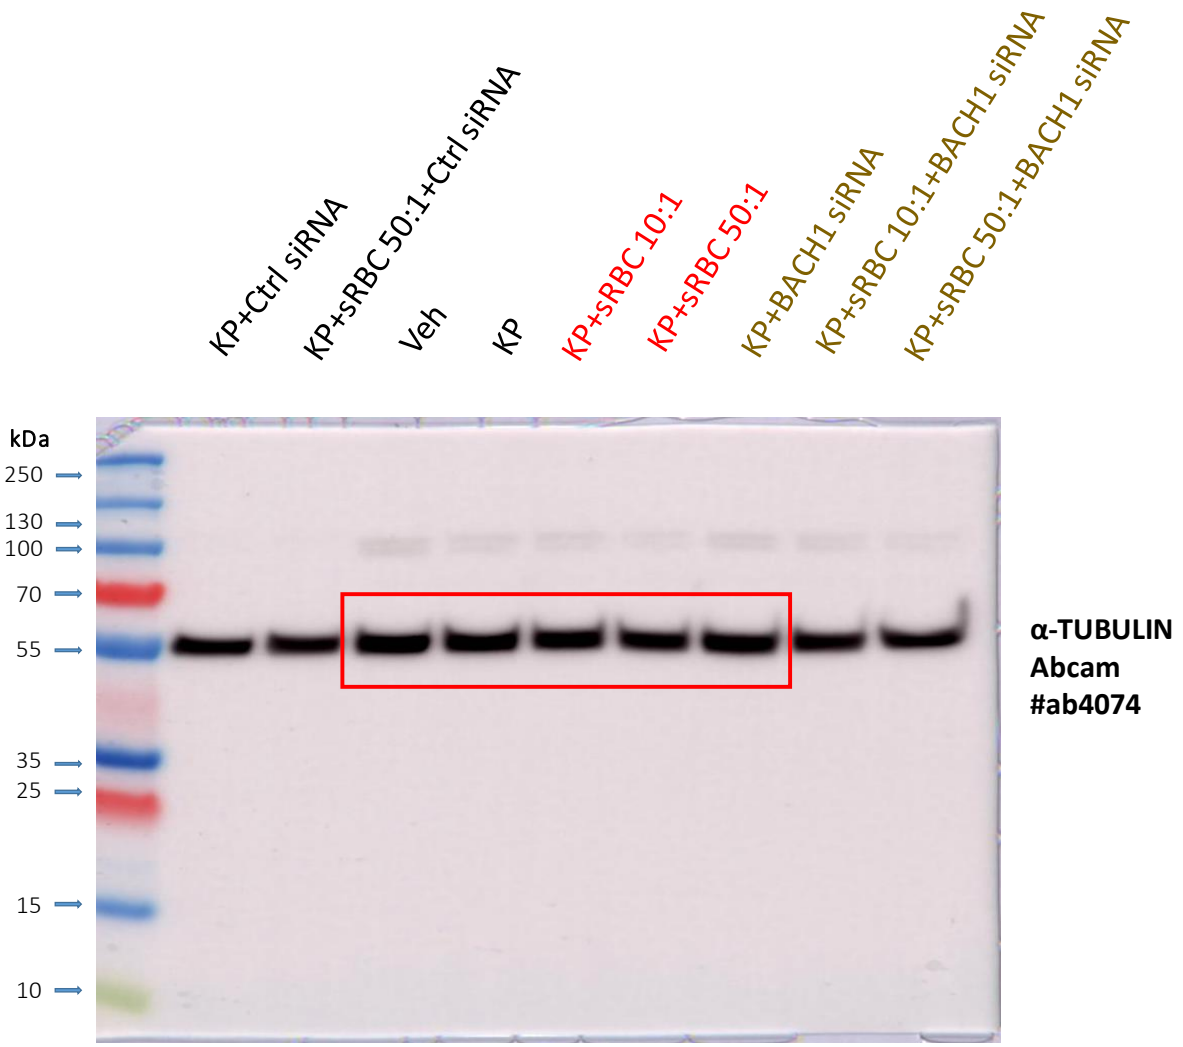

Supplemental Figure S9A: Full unedited blots. Red rectangle indicates depicted image.

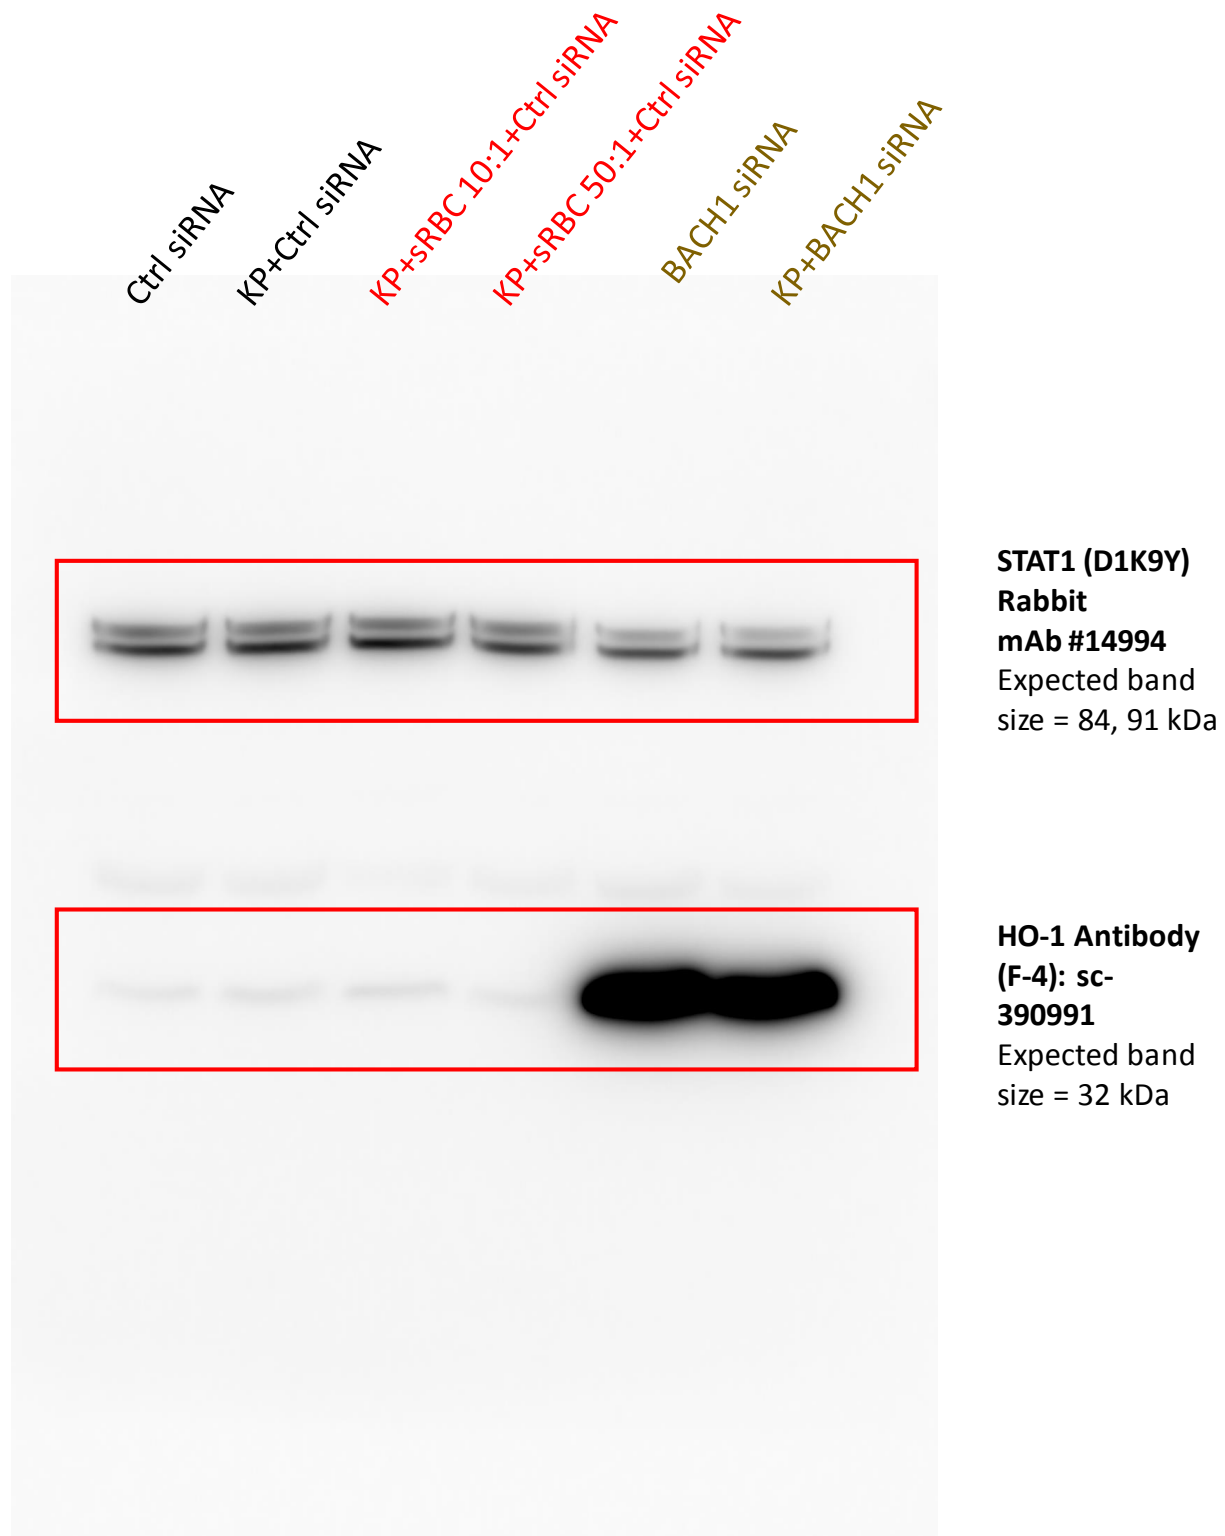

Supplemental Figure S9C: Full unedited blots. Red rectangle indicates depicted image.

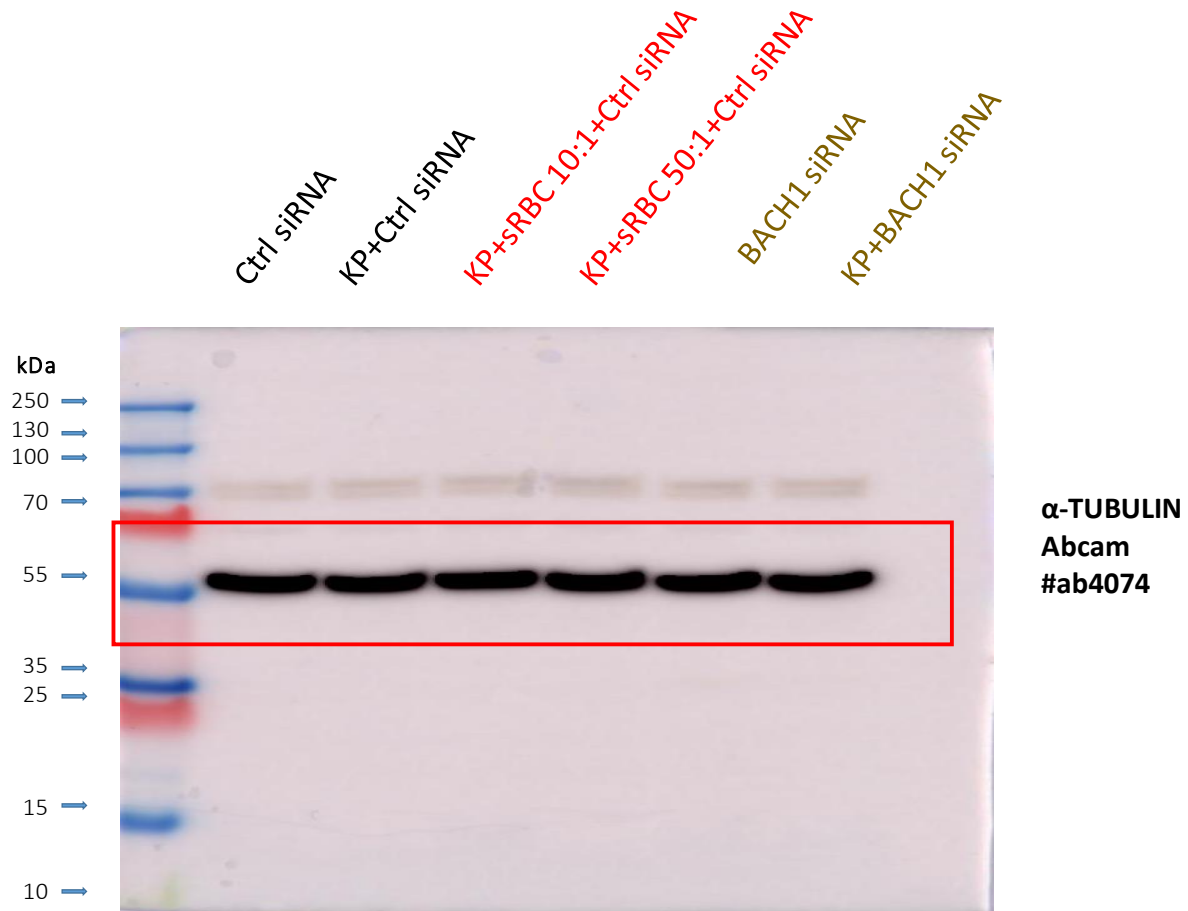

**Supplemental Figure S9C: Full unedited blots. Red rectangle indicates depicted image.**

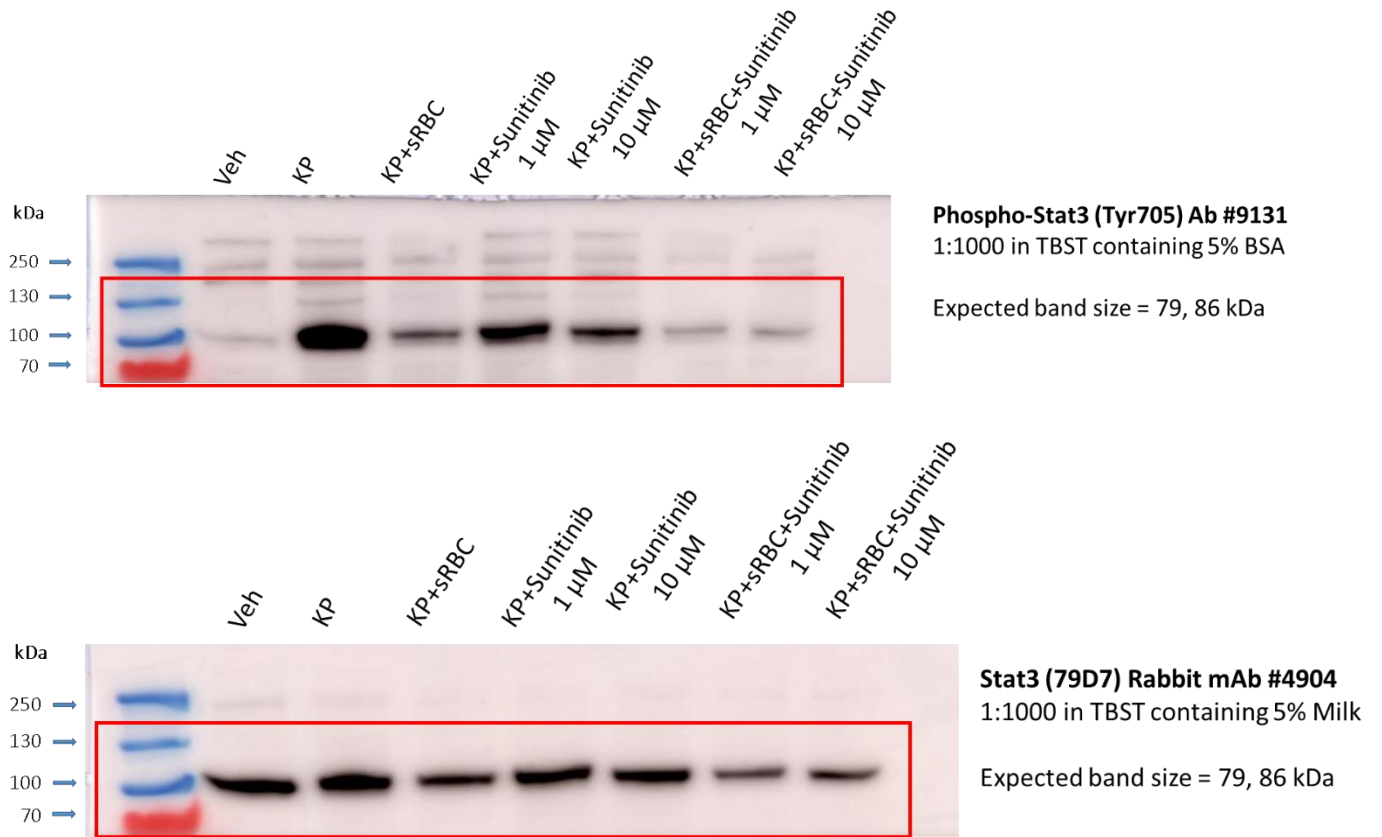

**Supplemental Figure S9F: Full unedited blots. Red rectangle indicates depicted image.**



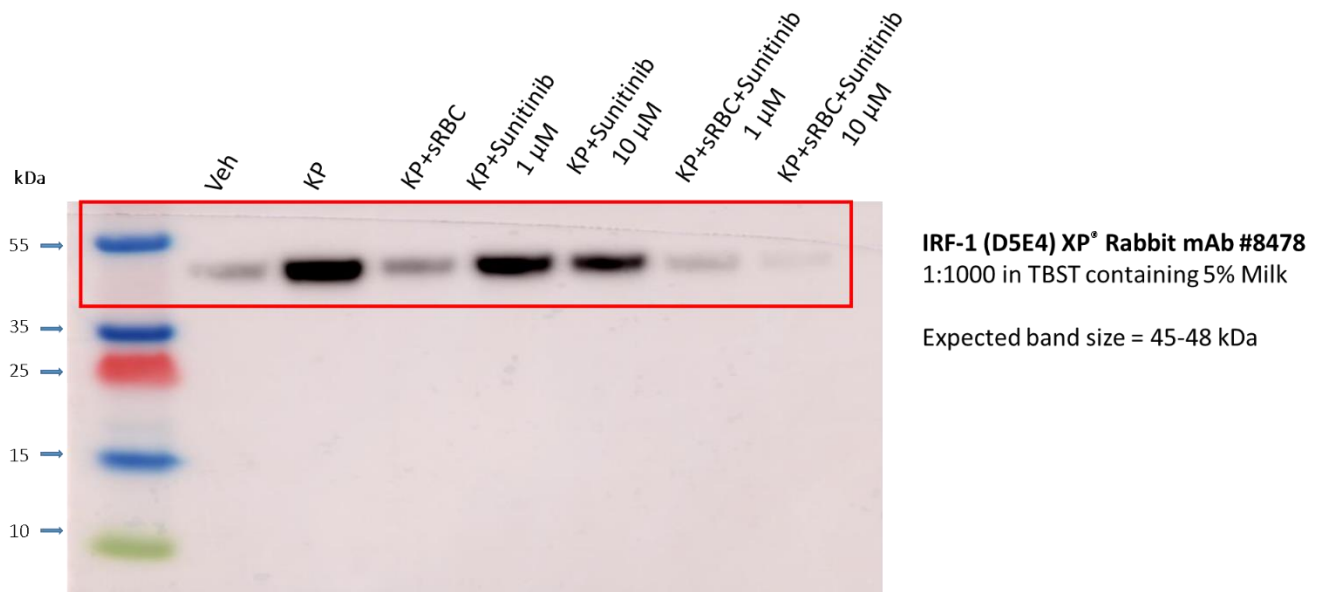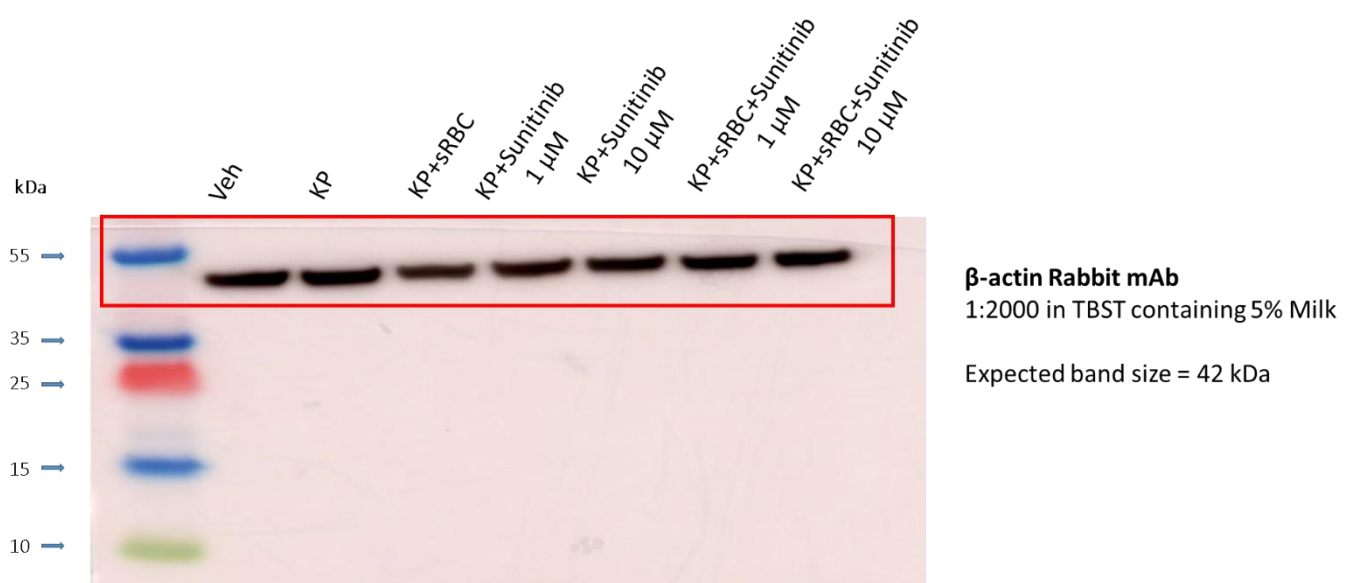

**Supplemental Figure S9F: Full unedited blots. Red rectangle indicates depicted image.**

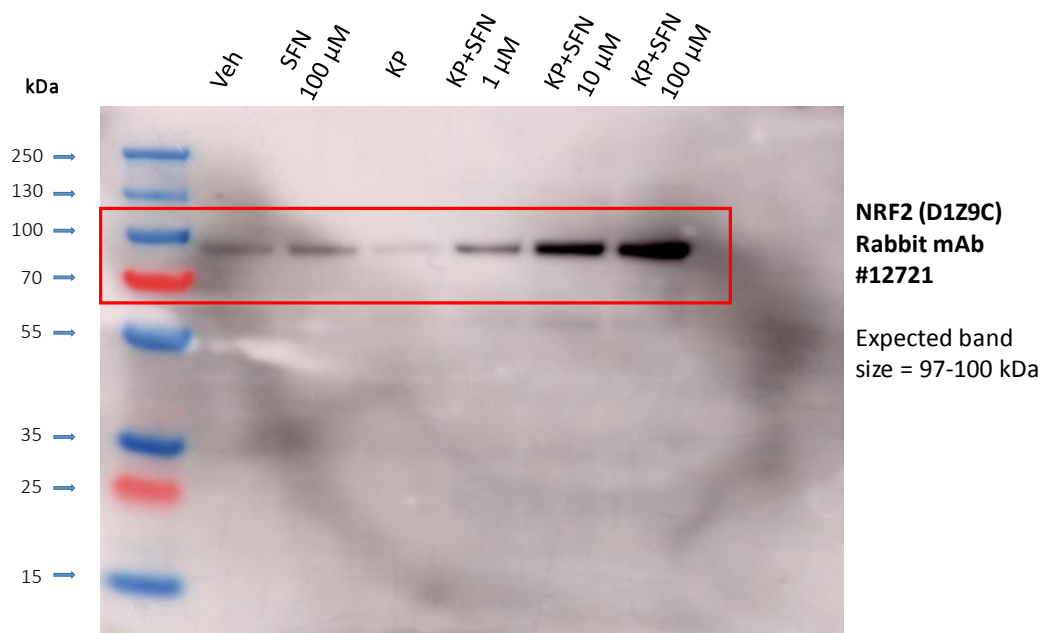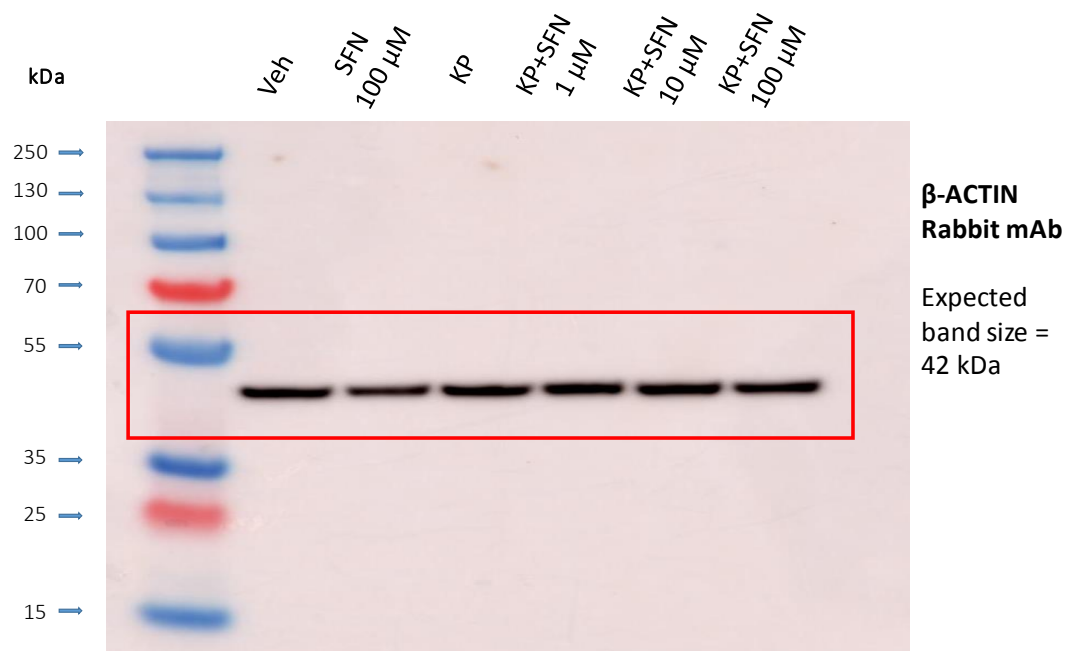

**Supplemental Figure S10C: Full unedited blots. Red rectangle indicates depicted image.**

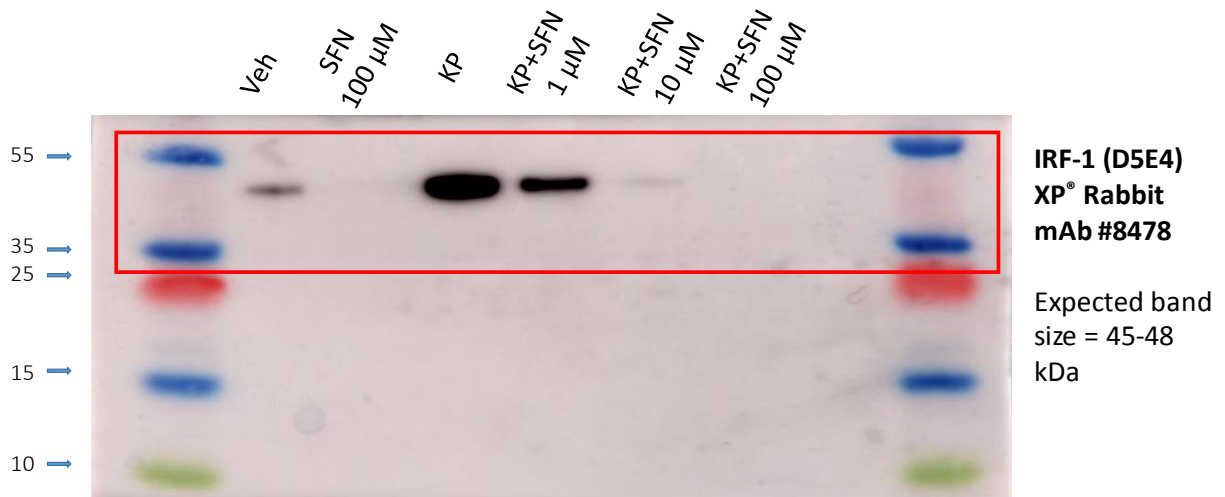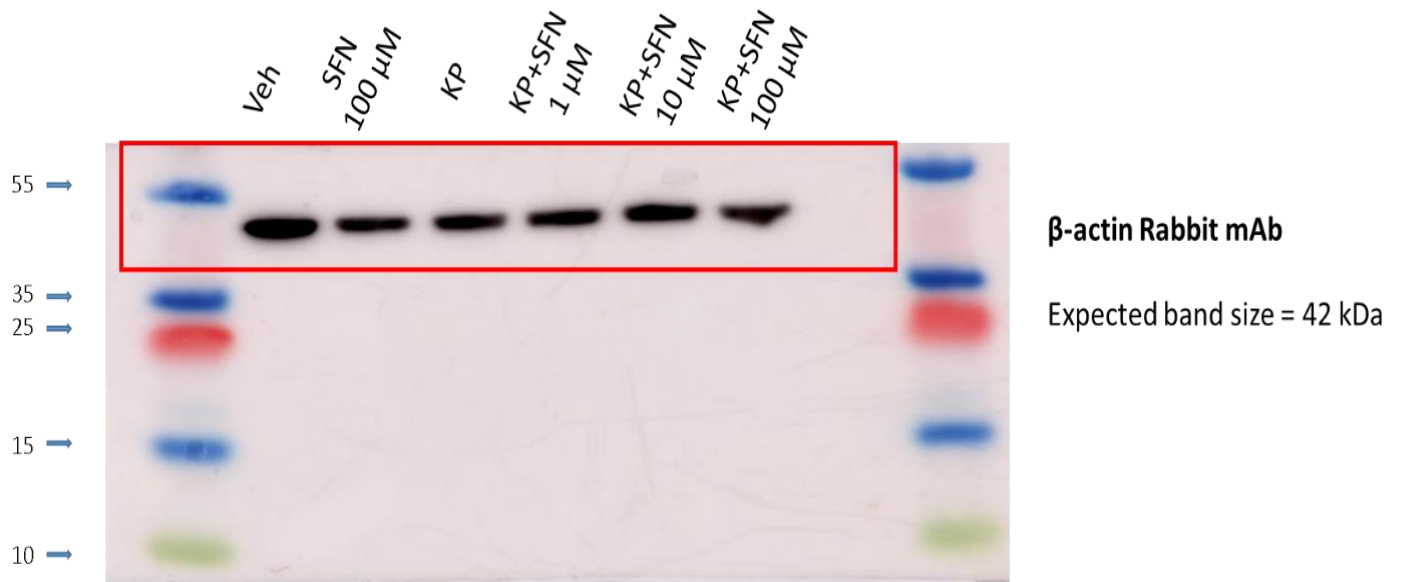

**Supplemental Figure S10D: Full unedited blots. Red rectangle indicates depicted image.**

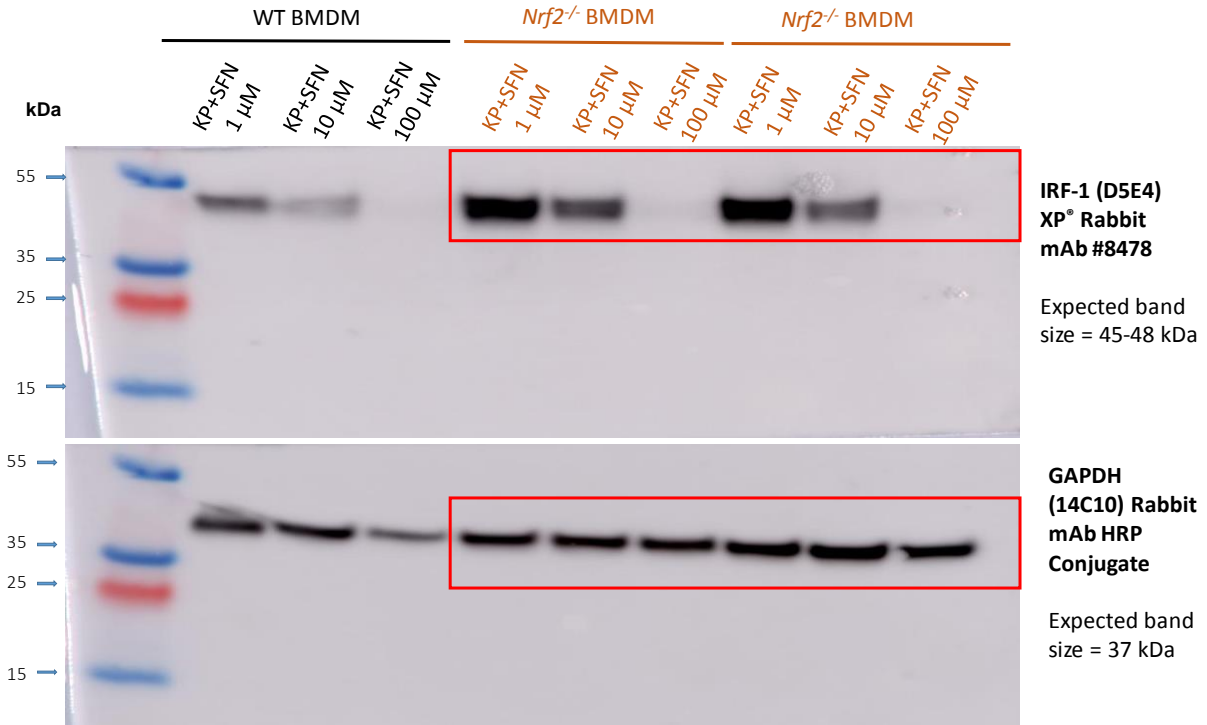

**Supplemental Figure S10G: Full unedited blots. Red rectangle indicates depicted image.**
